1 ***Enterobacterales*-associated plasmid sharing amongst human**  
2 **bloodstream infections, livestock, wastewater, and waterway**  
3 **niches: a genomic surveillance study in Oxfordshire, UK**

4

5 William Matlock<sup>\*1</sup>, Samuel Lipworth<sup>\*1,2</sup>, Kevin K. Chau<sup>1</sup>, Manal Abu Oun<sup>3</sup>, Leanne  
6 Barker<sup>1</sup>, James Kavanagh<sup>1</sup>, Monique Andersson<sup>2</sup>, Sarah Oakley<sup>2</sup>, Marcus Morgan<sup>2</sup>, Derrick  
7 W. Crook<sup>1,2,4,5</sup>, Daniel S. Read<sup>6</sup>, Muna Anjum<sup>3</sup>, Liam P. Shaw<sup>#,7</sup>/Nicole Stoesser<sup>#,1,2,4,5</sup>,  
8 REHAB Consortium

9

10 \* Contributed equally as first authors

11 # Contributed equally as senior authors

12 <sup>1</sup> Nuffield Department of Medicine, University of Oxford, Oxford, UK

13 <sup>2</sup> Oxford University Hospitals NHS Foundation Trust, Oxford, UK

14 <sup>3</sup> Animal and Plant Health Agency, Addlestone, UK

15 <sup>4</sup> NIHR Health Protection Research Unit in Healthcare Associated Infections and

16 Antimicrobial Resistance at University of Oxford in partnership with Public Health England,  
17 Oxford, UK

18 <sup>5</sup> NIHR Biomedical Research Centre, Oxford, UK

19 <sup>6</sup> Centre for Ecology and Hydrology, Wallingford, UK

20 <sup>7</sup> Department of Zoology, University of Oxford, Oxford, UK

21 **Correspondence:** William Matlock ([william.matlock@ndm.ox.ac.uk](mailto:william.matlock@ndm.ox.ac.uk)) and Nicole Stoesser  
22 ([nicole.stoesser@ndm.ox.ac.uk](mailto:nicole.stoesser@ndm.ox.ac.uk))

23

- 24 **Keywords:** plasmid, *Enterobacterales*, antimicrobial resistance (AMR), bloodstream  
25 infections (BSI), One Health, genomic epidemiology, *Escherichia coli*

26 **Abstract**

27 **Background**

28 Plasmids enable the dissemination of antimicrobial resistance (AMR) in common  
29 *Enterobacterales* pathogens, representing a major public health challenge. However, the  
30 extent of plasmid sharing between *Enterobacterales* causing human infections and those from  
31 other niches remains unclear. Studies to date have been small, with dispersed sampling  
32 frames, restricted to drug-resistant isolates only, and using incomplete plasmid sequence  
33 reconstruction.

34 **Methods**

35 We established a geographically and temporally restricted collection of human bloodstream  
36 infection (BSI)-associated, livestock-associated (cattle, pig, poultry, and sheep faeces, farm  
37 soils) and wastewater treatment work (WwTW)-associated (influent, effluent, waterways  
38 upstream/downstream of effluent outlets) *Enterobacterales*. Isolates were collected between  
39 2008-2020 from sites <60km apart in Oxfordshire, UK, and sequenced using short-  
40 (Illumina) and long-read (PacBio, Nanopore) approaches to fully reconstruct bacterial  
41 genomes.

42 **Findings**

43 We analysed 1,458 complete *Enterobacterales* genomes, including 3,697 circularised  
44 plasmids, one-third of which represented novel diversity. Plasmid alignment-free clustering  
45 identified 122/247 (49%) closely related clusters containing plasmids found in human BSIs  
46 and  $\geq 1$  other niche (73/247 [30%] such clusters across human BSI and livestock-associated  
47 niches). Seventeen groups of near-identical plasmids ( $n=84$  plasmids) were seen across  
48 human BSIs and  $\geq 1$  other sampling niche (eight groups across human BSI and livestock-  
49 associated niches), including six AMR-gene associated groups. Pangenome-style analyses of  
50 the 69 most prolific clusters ( $n=1,832/3,697$  plasmids) revealed shared, core, “backbone”

51 gene sets. Core-gene plasmid phylogenies reflected an intertwined ecology where well-  
52 conserved plasmid backbones carried diverse accessory functions, potentially linked to niche  
53 adaptation. Closely related plasmids were found across distantly related bacterial lineages and  
54 species.

## 55 **Interpretation**

56 We identified significant plasmid diversity, highlighting the challenges in adequately  
57 sampling natural plasmid populations. Many genetically related plasmids were seen across  
58 species and niches, raising the possibility that plasmid movement between these followed by  
59 rapid accessory gene change may be relatively common. Dense, unselected sampling is  
60 highly relevant to developing our understanding of plasmid epidemiology and designing  
61 appropriate interventions to limit the dissemination of plasmid-associated AMR.

## 62 **Funding**

63 This study was funded by the Antimicrobial Resistance Cross-council Initiative supported by  
64 the seven research councils and the NIHR, UK.

65

## 66 **Research in context**

### 67 **Evidence before this study**

68 We searched PubMed using the search terms (*Enterobacterales* AND plasmid\*) AND  
69 (Human OR Animal OR wastewater OR river OR sewage OR environment\*) and  
70 (*Enterobacterales* AND plasmid\*) AND (“One Health”) to 04/Jul/2022 with no restrictions  
71 on start date or language. We identified 221 studies, of which 167 (76%) were investigating  
72 *Enterobacterales* plasmid epidemiology to a lesser or greater extent. 108 (65%) studies  
73 analysed >1 *Enterobacterales* species, 49 (29%) studies investigated >50 isolates, 38 (23%)  
74 studies completely reconstructed all genomes being evaluated (20 studies a subset of  
75 genomes), 23 (14%) studies sampled across multiple niches, and only seven (4%) studies

76 considered drug- and non-drug-resistant isolates. We identified no large-scale study which  
77 considered plasmid epidemiology in several species of drug-resistant and non-resistant  
78 *Enterobacterales* across multiple human and non-human niches.

#### 79 **Added value of this study**

80 For the first time, we demonstrate that *Enterobacterales* plasmid transfer and evolution  
81 between geographically proximate niches, including human bloodstream infection and  
82 livestock-associated niches, is not uncommon. This includes closely related plasmids  
83 associated with AMR, observed across *Enterobacterales* species and lineages, underscoring  
84 the relevance of our findings for “One Health” for AMR management approaches. Our study  
85 also highlights that plasmid diversity in *Enterobacterales* is substantial and undersampled to  
86 date.

#### 87 **Implications of all the available evidence**

88 Our understanding of *Enterobacterales* plasmid and AMR epidemiology has been limited by  
89 the size and scope of available studies. In the largest systematic study to date, we demonstrate  
90 that whilst in some cases niche-/host-associated plasmid structuring exists, multiple  
91 *Enterobacterales* plasmid clusters, including those associated with AMR genes, can  
92 disseminate widely.

93 **Introduction**

94 *Enterobacterales* are found both in human niches (e.g., hospital patients<sup>1,2</sup> and wastewater<sup>3</sup>)  
95 and non-human niches (e.g., livestock-associated<sup>4,5</sup> and waterways<sup>6</sup>). In recent decades,  
96 widespread carriage of antimicrobial resistance (AMR) genes has complicated the treatment  
97 of *Enterobacterales* infections<sup>7,8</sup>. The dissemination of AMR genes between  
98 *Enterobacterales* occurs in a ‘Russian-doll’-style hierarchy of nested, mobilisable genetic  
99 structures<sup>9</sup>: genes not only move between bacterial hosts on mobilisable or conjugative  
100 plasmids but can also be transferred within and between plasmids and chromosomes by  
101 smaller mobile genetic elements (MGEs) such as insertion sequences<sup>10,11</sup>. Despite gene  
102 gain/loss events, many plasmids have been shown to have a persistent structure encoding  
103 replication and transfer machinery<sup>12,13</sup>.

104

105 Many plasmids can transfer between species and are seen across different niches<sup>14</sup> but the  
106 extent to which they are shared between human and non-human niches remains poorly  
107 understood. Previous studies investigating this topic have often been limited in size given the  
108 genetic diversity in these niches<sup>15,16</sup>, and/or restricted to single species<sup>17</sup> or drug-resistant  
109 isolates<sup>18</sup>. Further, fragmented genome assemblies in many cases make recovering complete  
110 plasmids, and other MGEs, impossible<sup>19</sup>. There are clearly multiple instances where AMR  
111 genes are believed to have emerged from non-human niches and subsequently become major  
112 clinical problems in human *Enterobacterales* infections, highlighting the relevance of inter-  
113 niche transfer in AMR gene dissemination (e.g., *mcr-1*<sup>20</sup> and *bla*<sub>NDM-1</sub><sup>21</sup>).

114

115 To explore *Enterobacterales* plasmid diversity and sharing across niches in a geographically  
116 and temporally restricted context, we studied hybrid assemblies (i.e., using both long and  
117 short reads) of large *Enterobacterales* isolate collections in Oxfordshire, UK, from (i) human

118 bloodstream infections (BSI; 2008-2018), (ii) livestock-associated sources (faeces from  
119 cattle, pigs, poultry, sheep; surrounding environmental soils; [all 2017 except poultry 2019-  
120 2020], and (iii) wastewater treatment work (WwTW)-associated sources (influent, effluent,  
121 waterways upstream/downstream of effluent outlets; Oxfordshire, 2017).

122

## 123 **Methods**

### 124 **Livestock-associated isolates**

125 *n*=247 *Enterobacterales* isolates from farm-proximate soils and poultry faeces (*n*=19 farms;  
126 *n*=5 cattle, *n*=4 pig, *n*=5 poultry, *n*=5 sheep) were collected and sequenced for this study in  
127 2017-2020. DNA extraction and sequencing was performed as in Shaw *et al.*, 2021<sup>11</sup>.

128 Genomes were hybrid assemblies reconstructed using Unicycler<sup>22</sup> (v. 0.4.4; default hybrid  
129 assembly parameters except `min_component_size 500` and `--min_dead_end_size 500`). Only  
130 complete assemblies (plasmids and chromosomes) were considered (*n*=162/247).

### 131 **BSI isolates**

132 Sequenced Human BSI *Enterobacterales* isolates from patients presenting to *n*=4 hospitals  
133 within Oxfordshire, UK, September 2008-December 2018, as described in Lipworth *et al.*,  
134 2021<sup>23</sup> were also included. Although all patients were sampled in Oxfordshire, a total of  
135 *n*=505/738 patients resided in Oxfordshire, *n*=133/738 in surrounding counties, and  
136 *n*=100/738 had location information omitted. Only complete assemblies (*n*=738/953 total  
137 assembled) were considered.

### 138 **Other livestock-associated and WwTW-associated isolates**

139 *Enterobacterales* isolates from faeces from the *n*=14 non-poultry farms and wastewater  
140 influent, effluent, and waterways upstream/downstream of effluent outlets surrounding *n*=5  
141 WwTWs, across 3 seasonal timepoints in 2017 (as in <sup>11</sup>) were included. Only complete  
142 assemblies (*n*=558/827 total assembled) were considered.

## 143 **Statistical analysis and bioinformatics**

144 Chromosome sequence types (STs) were determined with mlst (v. 2.19.0; see Supplementary  
145 Methods). To generate accumulation curves (ACs), new plasmid diversity was recorded for  
146 each isolate sampled randomly, without replacement. A bootstrapped average of  $b=1,000$   
147 ACs was used to estimate a Heap's parameter ( $\gamma$ ) by fitting a linear regression to log-log  
148 transformed data see (Supplementary Methods). We adopted three approaches to plasmid  
149 classification, using COPLA to classify plasmids into broad plasmid taxonomic units (PTUs),  
150 and also grouping and clustering plasmids into smaller clusters using alignment-free  
151 distances (see Supplementary Methods). Within plasmid clusters, we identified core genes  
152 with Panaroo (v. 1.2.9), aligned them with mafft (v7.407) and produced trees with IQ-tree (v.  
153 2.0.6). Plots were primarily produced using the R library ggplot2, with additional graphics in  
154 BioRender. More information can be found in the Supplementary Methods.

155

## 156 **Results**

157 Our dataset of  $n=3,697$  plasmids from  $n=1,458$  isolates (Fig. 1a, Table 1) contained bacteria  
158 from human bloodstream infections (BSI;  $n=1,880$  plasmids from  $n=738$  isolates), livestock-  
159 associated sources (cattle, pig, poultry, and sheep faeces, soils surrounding livestock farms;  
160  $n=1,155$  plasmids from  $n=512$  isolates), and from wastewater treatment works (WwTW)-  
161 associated sources (influent, effluent, waterways upstream/downstream of effluent outlets;  
162  $n=662$  plasmids from  $n=208$  isolates). All sampling sites were  $<60$ km apart (Fig. 1b) and  
163 timeframes overlapped (2008-2020; Fig. 1c). Isolates had a median 2 plasmids (IQR=1-4,  
164 range=0-16). Major *Enterobacterales* genera represented included:  $n=1,044$  *Escherichia*,  
165  $n=211$  *Klebsiella*,  $n=125$  *Citrobacter*, and  $n=63$  *Enterobacter*.

166



| <b>Table 1. Isolate niche breakdown.</b>    |                                                               |                     |                     |
|---------------------------------------------|---------------------------------------------------------------|---------------------|---------------------|
| <b>Niche</b>                                | <b>Sample type(s)</b>                                         | <b>No. isolates</b> | <b>No. plasmids</b> |
| Bloodstream infections (BSI)                | Community, nosocomial, other healthcare associated infections | 738                 | 1,880               |
| Livestock-associated                        | Cattle faeces                                                 | 133                 | 215                 |
|                                             | Sheep faeces                                                  | 113                 | 286                 |
|                                             | Pig faeces                                                    | 104                 | 352                 |
|                                             | Poultry faeces                                                | 34                  | 112                 |
|                                             | Soil surrounding livestock farms                              | 128                 | 190                 |
| Wastewater treatment work (WwTW)-associated | Influent                                                      | 88                  | 313                 |
|                                             | Upstream waterways                                            | 25                  | 60                  |
|                                             | Effluent/downstream waterways                                 | 95                  | 289                 |
| <b>Total</b>                                |                                                               | <b>1,458</b>        | <b>3,697</b>        |

| <b>Table 2. Isolate genus breakdown.</b>    |                      |                     |                    |                   |              |              |
|---------------------------------------------|----------------------|---------------------|--------------------|-------------------|--------------|--------------|
| <b>Niche</b>                                | <b>Isolate genus</b> |                     |                    |                   |              | <b>Total</b> |
|                                             | <i>Citrobacter</i>   | <i>Enterobacter</i> | <i>Escherichia</i> | <i>Klebsiella</i> | <b>Other</b> |              |
| Bloodstream infections (BSI)                | 6                    | 11                  | 547                | 161               | 13           | <b>738</b>   |
| Livestock-associated                        | 54                   | 10                  | 433                | 14                | 1            | <b>512</b>   |
| Wastewater treatment work (WwTW)-associated | 65                   | 42                  | 64                 | 37                | 0            | <b>208</b>   |
| <b>Total</b>                                | <b>125</b>           | <b>63</b>           | <b>1,044</b>       | <b>212</b>        | <b>14</b>    | <b>1,458</b> |

168

169 Sampling niche was strongly associated with isolate genus (Fisher’s test,  $p$ -value<5e-4; Table  
170 2). *Klebsiella* isolates were disproportionately derived from BSI versus other niches (76%  
171 [161/212] versus 51% [738/1,458]). *Citrobacter* and *Enterobacter* were disproportionately  
172 derived from WwTW-associated versus other niches (52% [65/125] and 67% [42/63] versus  
173 14% [208/1,458]). Chromosomal Mash trees (see Supplementary Methods) for the two most  
174 common species in the dataset, *E. coli* (72% [1,044/1,458]; see Fig. S1) and *K. pneumoniae*  
175 (11% [163/1,458]; Fig. S2) demonstrated intermixing of human and non-human isolates  
176 within clades, consistent with species-lineages not being structured by niche.

177

178 We contextualised our plasmids within known plasmid diversity using ‘plasmid taxonomic  
179 units’ (PTUs; using COPLA, see Supplementary Methods), designed to be equivalent to a  
180 plasmid ‘species’. We found 32% (1,193/3,697) of plasmids were unclassified, highlighting  
181 the substantial plasmid diversity within this geographically restricted dataset. In total, we

182 found  $n=67$  known PTUs, containing a median 9 plasmids (IQR=4-30, range=1-556), with  
183 the largest PTU- $F_E$  (556/2,504), corresponding to F-type *Escherichia* plasmids.

184

### 185 **Near-identical plasmid sharing observed between human and livestock-associated**

#### 186 ***Enterobacterales***

187 We screened for near-identical plasmids shared across isolates by grouping those with a low  
188 Mash distance ( $d < 0.0001$ ) and highly similar lengths (longest plasmid  $\leq 1\%$  longer than  
189 shorter plasmids; see Supplementary Methods). We found  $n=225$  near-identical groups of  $\geq 2$   
190 members, recruiting 19% (712/3,697) plasmids. Bootstrapping accumulation curves for near-  
191 identical plasmid groups and singletons per the number of isolates (ACs; see Supplementary  
192 Methods), we revealed a highly ‘open’ accumulation (Heap’s parameter  $\gamma=0.97$ , Fig. S3)  
193 suggesting further isolate sampling would detect more unique plasmids approximately  
194 linearly. Restricted to BSI/livestock-associated isolates alone, we found similar curves for  
195 both niches (BSI  $\gamma=0.98$ , livestock-associated  $\gamma=0.94$ ), suggesting they had similar levels of  
196 plasmid diversity.

197

198 Near-identical pairs of plasmids were most common, representing 71% (159/225) of groups  
199 (group size IQR=2-3, range=2-32). Plasmid members of near-identical groups represented  
200 multiple bacterial host STs (25% [56/225]), species (4% [9/225]), and genera (4% [9/225]),  
201 consistent with plasmids capable of inter-lineage/species/genus transfer. Further, 8% (17/225)  
202 of near-identical groups contained plasmids found across human BSIs and  $\geq 1$  other sampling  
203 niche (livestock-associated/WwTW-associated), suggesting inter-niche transfer (i.e., ‘cross-  
204 niche groups’; Fig. 2a). Within cross-niche groups,  $n=3/17$  contained plasmids from multiple  
205 bacterial species (Fig. 2b), and most consisted of conjugative plasmids ( $n=5/17$  conjugative,  
206  $n=9/17$  mobilisable,  $n=3/17$  non-mobilisable; Fig. 2c). AMR genes were carried by plasmids

207 in  $n=6/17$  cross-niche groups (Fig. 2d), with  $n=5/6$  of these groups containing  $\geq 1$  beta-  
208 lactamase protein.

209

210 Sharing between BSI and livestock-associated isolates was supported by 8/17 cross-niche  
211 groups ( $n=45$  plasmids). Of these,  $n=2/8$  contained non-mobilisable Col-type plasmids (one  
212 group contained BSI/pig/poultry/influent plasmids, and one group contained BSI/poultry  
213 plasmids);  $n=4/8$  contained mobilisable Col-type plasmids (two groups contained BSI/pig  
214 plasmids, one group contained BSI/sheep plasmids, and one group contained  
215 BSI/cattle/pig/poultry/sheep/influent plasmids), of which one group contained BSI/pig  
216 plasmids carrying the AMR genes *aph(3'')-Ib*, *aph(6)-Id*, *dfrA14*, and *sul2* (see  
217 Supplementary Methods). The remaining 2/8 groups contained conjugative FIB-type  
218 BSI/sheep plasmids. One group contained plasmids, carrying the AMR genes *aph(3'')-Ib*,  
219 *aph(6)-Id*, *bla<sub>TEM-1</sub>*, *dfrA5*, *sul2*, and the other group contained plasmids carrying the MDR  
220 efflux pump protein *robA*.

221

## 222 **Plasmid clustering reveals a diverse but intertwined population structure across niches**

223 Near-identical plasmids shared across niches are a likely signature of recent transfer events,  
224 but we also wanted to examine the wider plasmid population structure. We therefore  
225 agnostically clustered all plasmids based on alignment-free sequence similarity (clusters were  
226 groups of  $n \geq 3$  plasmids; see Supplementary Methods and Figs. S5-6). We defined  $n=247$   
227 plasmid clusters with median 5 members (IQR=3-10, range=3-123) recruiting 71%  
228 (2,627/3,697) of the plasmids. The remainder were either singletons (i.e., single, unconnected  
229 plasmids; 19% [718/3,697]) or doubletons (i.e., pairs of connected plasmids; 10%  
230 [352/3,697]). By bootstrapping  $b=1,000$  ACs for plasmid clusters, doubletons, and singletons  
231 found against number of isolates sampled (Fig. S7; see Supplementary Methods), we

232 estimated that the rarefaction curve had a Heap's parameter  $\gamma=0.75$ , suggesting further isolate  
233 sampling would likely detect more plasmid diversity and clusters.

234

235 Of the plasmid clusters,  $n=69/247$  (28%) plasmid clusters had  $\geq 10$  members, representing  
236 50% (1,832/3,697) of all plasmids (Fig. 3a). 122/247 (49%) clusters contained BSI plasmids  
237 and plasmids from  $\geq 1$  other niche. This included 73/247 (30%) of clusters with both BSI and  
238 livestock-associated plasmids, representing  $n=38$  unique plasmid replicon haplotypes (i.e.,  
239 combinations of replication proteins) of which only 24% (9/38) were Col-type plasmids,  
240 which are often well-conserved and carry few genes<sup>24</sup>. 72/247 (29%) of clusters contained  
241 both BSI, and influent/effluent/downstream plasmids, reflecting a route of *Enterobacterales*  
242 dissemination into waterways. In contrast, only 18/247 (7%) of clusters contained both BSI  
243 and upstream waterway plasmids, of which most (13/18 [72%]) also contained  
244 influent/effluent/downstream plasmids.

245

246 Overall, plasmid clusters scored high homogeneity ( $h$ ) but low completeness ( $c$ ) with respect  
247 to biological and ecological characteristics (non-putative PTUs [ $h=0.99$ ,  $c=0.66$ ]; replicon  
248 haplotype [ $h=0.92$ ,  $c=0.69$ ]; bacterial host ST [ $h=0.84$ ,  $c=0.14$ ] in Fig. 3b; predicted mobility  
249 [ $h=0.93$ ,  $c=0.20$ ] in Fig 3c). This indicated that clustered plasmids often had similar  
250 characteristics, but the same characteristics were often observed in multiple clusters. The  
251 imperfect homogeneity is to be anticipated as replicon haplotypes and mobilities can vary  
252 within plasmid families, and plasmid families can have diverse host ranges<sup>14</sup>.

253

254 Plasmids carrying AMR genes were found in 21% (52/247) of the plasmid clusters (i.e.,  
255 'AMR-carrying clusters'), representing  $n=550$  plasmids (Fig. 3d). Of the AMR-carrying  
256 clusters, 92% (48/52) contained at least one beta-lactamase-carrying plasmid ( $n=437$

257 plasmids in total). AMR genes were present in a median proportion 67% of AMR-carrying  
258 cluster members (IQR=28-100%, range=3-100%). This highlights that AMR genes are not  
259 necessarily widespread on genetically similar plasmids and can be potentially acquired  
260 multiple different times through the activity of smaller MGEs (e.g. transposons) or  
261 recombination. For example, cluster 12 was a group of  $n=42$  conjugative, PTU-F<sub>E</sub> plasmids  
262 found in BSI, wastewater, and waterways. Of these, 31% (13/42) carried the AMR gene  
263 *bla*<sub>TEM-1</sub>, and in a range of genetic contexts:  $n=9/13$  *bla*<sub>TEM-1</sub> genes were found within Tn3 and  
264  $n=4/13$  were carried without a transposase, of which  $n=2/4$  were found with the additional  
265 AMR genes *aph(6)-Id*, *aph(3'')-Ib*, and *sul2*. AMR genes were disproportionately carried by  
266 F-type plasmids (61% [337/550] AMR-carrying cluster plasmids versus 34% [891/2627] of  
267 the total clustered plasmids), further underlining the known role of F-type plasmids in AMR  
268 gene dissemination<sup>13</sup>.

269

## 270 **An intertwined ecology of plasmids across human and livestock-associated niches**

271 Plasmids can change their genetic content, particularly when subject to new selective  
272 pressures<sup>25,26</sup>. Many plasmids have a structure with a ‘backbone’ of conserved core genes and  
273 a ‘cargo’ of variable accessory genes<sup>12,13</sup>. We wanted to explore evidence for cross-niche  
274 plasmids with minimal mutational evolution in a shared backbone (compatible with ~years of  
275 evolutionary separation) but variable accessory gene repertoires.

276

277 We first conducted a pangenome-style analysis (see Supplementary Methods) on the  
278  $n=69/247$  plasmid clusters with  $\geq 10$  members. For each cluster, we determined “core” (genes  
279 found in  $\geq 95\%$  of plasmids) and “accessory” gene repertoires (found in  $< 95\%$  of plasmids).  
280 Within clusters, we found median 9 core genes (IQR=4-53, range=0-219), and median 9  
281 accessory genes (IQR=3-145, range=0-801) (Fig. 3e). Core genes comprised a median

282 proportion 42.2% of the total pangenome sizes (IQR=20.9-66.7%). At an individual plasmid  
283 level, core genes shared by a cluster comprised a median proportion 62.5% of each plasmid's  
284 gene repertoire (IQR=37.4-83.3%; Fig. 3e). Putatively conjugative plasmids carried a  
285 significantly higher proportion of accessory genes in their repertoires than mobilisable/non-  
286 mobilisable plasmids (Kruskal-Wallis test [ $H(2)=193.01$ ,  $p$ -value $<2.2e-16$ ] followed by  
287 Dunn's test).

288

289 Using multiple sequence alignments of the core genes within each cluster, we produced  
290 maximum likelihood phylogenies (see Supp. File 1 and Supplementary Methods). For this  
291 step, we only considered the  $n=62/69$  clusters where each plasmid had  $\geq 1$  core gene. With the  
292  $n=27/62$  clusters that contained both BSI and livestock-associated plasmids, we measured the  
293 phylogenetic signal for plasmid sampling niche using Fritz and Purvis'  $D$  (see Table S1 and  
294 Supplementary Methods). The analysis indicated that the evolutionary history of plasmid  
295 clusters is neither strictly segregated by sampling niche nor completely intermixed, but  
296 something intermediate.

297

298 Alongside the core gene phylogenies, we generated gene repertoire heatmaps (example  
299 cluster 2 in Fig. 4a-b; all clusters and heatmaps in Supp. File 1). By visualising the genes in a  
300 consensus synteny order (see Supplementary Methods), the putative backbone within each  
301 plasmid cluster is shown alongside its accessory gene and transposase repertoire. This  
302 highlights how plasmids might gain/lose accessory functions within a persistent backbone.  
303 Log-transformed linear regression revealed a significant relationship between Jaccard  
304 distance of accessory genes presence against core gene cophenetic distance  
305 ( $y=0.080\log(x)+0.978$ ,  $R^2=0.47$ ,  $F(1,52988)=4.75e4$ ,  $p$ -value $< 2.2e-16$ ; see Fig. S8 and  
306 Supplementary Methods).

307

308 **Plasmid evolution between human and livestock-associated niches is not structured by**  
309 **bacterial host**

310 Alongside vertical inheritance, conjugative and mobilisable plasmids are capable of inter-host  
311 transference, crossing between bacterial lineages, species, up to phyla<sup>14</sup>. However, bacterial  
312 surveillance often only tracks clonally evolving lineages<sup>27</sup>, which might not account for  
313 clinically relevant AMR genes mobilised on plasmids. Phylogenetic analysis can determine  
314 whether plasmid evolution between BSI and livestock-associated niches is driven by host  
315 clonal expansion or other means.

316

317 As a detailed example, we evaluated the largest plasmid cluster containing both human and  
318 livestock-associated plasmids (cluster 2,  $n=100$  members). All plasmids carried at least one  
319 F-type replicon and were all putatively conjugative, with 75% (75/100) and 25% (25/100)  
320 assigned PTU-F<sub>E</sub> and a putative PTU, respectively. Further, 48% (48/100) plasmids carried  
321 *bla*<sub>TEM-1</sub>, and 51% (51/100) carried >1 AMR gene. All host chromosomes were *E. coli* except  
322 OX-BSI-481\_2 (*S. enterica* ST 2998; hereon omitted from the analysis). The  $n=99$  *E. coli*  
323 isolates represented six phylogroups: A (5/99), B1 (18/99), B2 (52/99), C (14/99), D (7/99),  
324 and G (3/99; see Supplementary Methods).

325

326 Figure 4b-c shows the plasmid core gene phylogeny ( $T_{\text{plasmid}}$ ) and the *E. coli* host core gene  
327 phylogeny ( $T_{\text{chromosome}}$ ). The *E. coli* phylogeny was structured by six clades corresponding to  
328 the six phylogroups (see Supplementary Methods). We found low congruence between the  
329 plasmid core-gene phylogeny and the chromosomal core-gene phylogeny as seen in the  
330 central ‘tanglegram’ (i.e., lines connecting pairs of plasmid and chromosome tips from the  
331 same isolate). Additionally, we calculated a Robinson-Foulds distance  $RF(T_{\text{plasmid}},$



332  $T_{\text{chromosome}}=162$ , reflecting a high number of structural differences between the phylogenies  
333 (see Supplementary Methods). There was some evidence of plasmid structuring by niche  
334 (Fritz and Purvis'  $D=0.24$ ; see Supplementary Methods).

335

336 Within the plasmid phylogeny, there was a clade of  $n=44$  plasmids (support 100%; circled in  
337 grey in Figure 4b) containing both BSI and livestock-associated plasmids, which were within  
338 median 4 core gene SNPs of each other (IQR=2-8, range=0-59). Estimating plasmid  
339 evolution at an approximate rate of one SNP per year (see Supplementary Methods) would  
340 give a median time to most recent common ancestor of the backbone at approximately 4  
341 years prior to sampling, consistent with recent movement between human and livestock-  
342 associated niches. This plasmid clade was mainly present in phylogroup B2 (20/44), but also  
343 A (3/44), B1 (9/44), C (8/44), and D (4/44), suggesting plasmid movement. Further, 77%  
344 (34/44) of plasmids within the clade carried *bla*<sub>TEM-1</sub> (BSI: 25/34, Livestock-associated: 8/34,  
345 WwTW-associated: 1/34), and 82% (36/44) carried  $\geq 1$  AMR gene, highlighting the role of  
346 plasmids in cross-niche dissemination of AMR.

347

348 To examine the evolution of entire plasmid sequences within the clade, we represented all  
349  $n=44$  plasmids as a 'pangraph' (Figure 4d; see Supplementary Methods). Briefly, pangraph  
350 converts input sequences into a consensus graph, where each sequence is a path along a set of  
351 homologous sequence alignments i.e., 'blocks', which in series form 'pancontigs'. Filtering  
352 for 'core blocks' (i.e., those found in  $\geq 95\%$  plasmids), we found 4 pancontigs (40 blocks  
353 total), with the longest 98,269bp (total length 125,369bp), indicating a putative plasmid  
354 backbone (Fig. 4e). Then, filtering for 'accessory blocks' (i.e., those found in  $<95\%$   
355 plasmids), we found 18 pancontigs (39 blocks total), with median length 2,380bp (total length

356 63,753bp), forming the accessory gene repertoire (Fig. 4f). This points to a persistent plasmid  
357 backbone structure with loss/gain events at particular ‘hotspots’ as well as rearrangements.

358

## 359 **Discussion**

360 By analysing a dataset of  $n=3,697$  systematically collected *Enterobacteriales* plasmids  
361 sampled from human BSI, livestock- and WwTW-associated sources in a geographically and  
362 temporally restricted context, we find evidence of plasmid dissemination across niches,  
363 including those carrying clinically relevant AMR genes. We found 225 instances of shared,  
364 near-identical plasmid groups, 25% of which were found across multiple bacterial STs, 4%  
365 across multiple bacterial species, and 8% in both human BSI and  $\geq 1$  non-BSI niche. Beyond  
366 this near-identical sharing, we analysed ‘clusters’ of plasmids and found that that 73/247  
367 clusters contained plasmids seen in both human BSIs and other contexts. Over one fifth  
368 (52/247) of plasmid clusters contained plasmids carrying AMR genes ( $n=550$  plasmids). Our  
369 results suggest the need for broad, unselected, and detailed sampling frames to fully  
370 understand plasmid diversity and evolution.

371

372 Whilst some plasmid clusters are strongly structured by host phylogeny and isolate source,  
373 some plasmids from human BSIs are highly genetically related to those in other niches,  
374 including livestock. However, recovering these similarities is a sampling challenge.

375 Accumulation curve analyses suggested increasing the size of our dataset would have led to  
376 further near-identical matches at an approximately linear rate, meaning even a dataset of this  
377 size captures only a small fraction of the true extent of plasmid sharing between human  
378 clinical and other non-human/clinical niches. This presents a challenge for designing  
379 appropriately powered studies. Had we only sampled  $n=100$  livestock-associated isolates

380 (i.e., around 20% of our actual sample), there was only a 39% chance that we would have  
381 detected  $\geq 5$  matches with BSI plasmids (Fig. S4).

382

383 Given that plasmids observed in BSI isolates represent a restricted and small proportion of  
384 human *Enterobacteriales* diversity, many more sharing events may occur in the human gut<sup>28</sup>  
385 which we only sampled incompletely using wastewater influent as a proxy. The human colon  
386 contains around  $10^{14}$  bacteria<sup>29</sup>, with large ranges of *Enterobacteriaceae* abundance. Further,  
387 even small numbers of across-niche sharing events, such as transfer events of important AMR  
388 genes from species-to-species or niche-to-niche, may have significant clinical implications, as  
389 has been seen with several important AMR genes globally (e.g., *mcr-1*, *bla<sub>NDM-1</sub>*). Future  
390 studies need to carefully consider the limitations of sampling frames in detecting any genetic  
391 overlap, given both substantial diversity and the effects of niches and geography<sup>11,16</sup>.

392

393 By examining plasmid relatedness compared to bacterial host relatedness, we demonstrated  
394 that cross-niche plasmid spread is not driven by clonal lineages. Using a pangenome-style  
395 analysis, we showed that plasmids can share sets of near-identical core genes alongside  
396 diverse accessory gene repertoires. While plasmids with more distantly related core genes  
397 tended to have dissimilar accessory gene content, plasmids with more closely related core  
398 genes shared a wide range of accessory gene content. This would be consistent with a  
399 hypothesis of persistent ‘backbone’ structures gaining and losing accessory functions as they  
400 move between hosts and niches. We suggest that this mode of transfer might be worth  
401 considering. Evolutionary models for plasmids which can accommodate well-conserved  
402 backbone evolution alongside accessory structural changes and gain/loss events are urgently  
403 needed. Estimating plasmid evolutionary rates remains a challenge, with little known about

404 appropriate values for mutation rates in plasmids, and even less for non-mutational processes  
405 such as gene gain/loss.

406

407 Our study had several limitations. Our non-BSI isolates were not as temporally varied as the  
408 BSI isolates, meaning we could not fully explore temporal evolution. Isolate-based  
409 methodologies are limited in evaluating the true diversity of the niches sampled; composite  
410 approaches including metagenomics might shed additional insight in future studies. Further,  
411 the exact source of an isolate is poorly defined for wastewater/waterway isolates as they act  
412 as a confluence of multiple sources, although they represent important niches in their own  
413 right. We only analysed plasmids from complete genomes i.e., where the chromosome and all  
414 plasmids were circularised, meaning we disregarded ~23% and ~33% of BSI and non-BSI  
415 assemblies, respectively. We only focused on plasmids as horizontally transmissible elements  
416 here; detailed study of other smaller mobile genetic elements across-niches would represent  
417 interesting future work. We have also investigated a limited subset of *Enterobacterales*:  
418 plasmid sharing likely extends to other bacterial hosts not investigated here. Lastly, our  
419 isolate culture methods for livestock-associated samples may not have been as sensitive for  
420 the identification of *Klebsiella* spp. as for other *Enterobacterales* such as *Escherichia*, as we  
421 did not use enrichment and selective culture on Simmons citrate agar with inositol<sup>30</sup>.

422

423 In conclusion, this study presents to our knowledge the largest evaluation of systematically  
424 collected *Enterobacterales* plasmids across human and non-human niches within a  
425 geographically and temporally restricted context. Plasmids can clearly disseminate between  
426 niches, although this dynamic likely varies by cluster; the overall number of near-identical  
427 plasmid groups identified across niches consistent with recent transfer events was 8%  
428 (17/225) and influenced by sample size. We demonstrate a likely intertwined ecology of

429 plasmids across human and non-human niches, where different plasmid clusters are variably  
430 but incompletely structured and putative ‘backbone’ plasmid structures can rapidly gain and  
431 lose accessory genes following cross-niche spread. Future “One Health” studies require dense  
432 and unselected sampling, and complete/near-complete plasmid reconstruction, to  
433 appropriately understand plasmid epidemiology across niches.

434

#### 435 **Data availability**

436 Study metadata is provided in Table S2. Accessions for poultry and environmental soil isolate  
437 reads are given in Table S3, and assemblies will shortly be made available on NCBI.  
438 Accessions for existing BSI and REHAB reads and assemblies can be found in Lipworth *et*  
439 *al.*, 2021<sup>23</sup> and Shaw *et al.*, 2021<sup>11</sup>, respectively.

#### 440 **Code availability**

441 Analysis scripts can be found in the GitHub repository  
442 <https://github.com/wtmatlock/oxfordshire-overlap>.

#### 443 **REHAB Consortium.**

444 Manal AbuOun<sup>2</sup>, Muna F. Anjum<sup>2</sup>, Mark J. Bailey<sup>3</sup>, Brett H<sup>8</sup>, Mike J. Bowes<sup>3</sup>, Kevin K.  
445 Chau<sup>1</sup>, Derrick W. Crook<sup>1,6,7</sup>, Nicola de Maio<sup>1</sup>, Nicholas Duggett<sup>2</sup>, Daniel J. Wilson<sup>1,9</sup>,  
446 Daniel Gilson<sup>2</sup>, H. Soon Gweon<sup>3,4</sup>, Alasdair Hubbard<sup>10</sup>, Sarah J. Hoosdally<sup>1</sup>, William  
447 Matlock<sup>1</sup>, James Kavanagh<sup>1</sup>, Hannah Jones<sup>2</sup>, Timothy E. A. Peto<sup>1,6,7</sup>, Daniel S. Read<sup>3</sup>, Robert  
448 Sebra<sup>5</sup>, Liam P. Shaw<sup>1</sup>, Anna E. Sheppard<sup>1,6</sup>, Richard P. Smith<sup>2</sup>, Emma Stubberfield<sup>2</sup>, Nicole  
449 Stoesser<sup>1,6,7</sup>, Jeremy Swann<sup>1</sup>, A. Sarah Walker<sup>1,6,7</sup>, Neil Woodford<sup>11</sup>

450 <sup>1</sup> Nuffield Department of Medicine, University of Oxford, Oxford, UK

451 <sup>2</sup> Animal and Plant Health Agency, Weybridge, Addlestone, UK

452 <sup>3</sup> UK Centre for Ecology & Hydrology, Wallingford, UK

453 <sup>4</sup> University of Reading, Reading, UK

454 <sup>5</sup> Icahn Institute of Data Science and Genomic Technology, Mt Sinai, NY, USA

455 <sup>6</sup> NIHR HPRU in healthcare-associated infection and antimicrobial resistance, University of  
456 Oxford, Oxford, UK

457 <sup>7</sup> NIHR Oxford Biomedical Research Centre, University of Oxford, Oxford, UK

458 <sup>8</sup>Thames Water Utilities, Clearwater Court, Vastern Road, Reading, UK

459 <sup>9</sup>Wellcome Trust Centre for Human Genetics, University of Oxford, Roosevelt Drive,  
460 Oxford, UK

461 <sup>10</sup>Department of Tropical Disease Biology, Liverpool School of Tropical Medicine,  
462 Liverpool, UK

463 <sup>11</sup>Antimicrobial Resistance and Healthcare Associated Infections (AMRHAI) Reference Unit,  
464 National Infection Service, Public Health England, London, United Kingdom

465 **Declarations of interests.** The authors declare no interests.

466 **Role of the funding source.**

467 This work was funded by the Antimicrobial Resistance Cross-council Initiative supported by  
468 the seven research councils [grant NE/N019989/1]. The UKCEH component of the REHAB  
469 consortium was supported by the Natural Environment Research Council (NERC)  
470 [grant NE/N019660/1]. DWC, SG, TEAP and NS are supported by the National Institute for  
471 Health Research Health Protection Research Unit (NIHR HPRU) in Healthcare-Associated  
472 Infections and Antimicrobial Resistance at the University of Oxford in partnership with  
473 Public Health England (PHE) [grant HPRU-2012–10041 and NIHR200915]. DWC and  
474 TEAP are also supported by the NIHR Oxford Biomedical Research Centre. The  
475 computational aspects of this research were funded from the NIHR Oxford BRC with  
476 additional support from a Wellcome Trust Core Award Grant [grant 203141/Z/16/Z]. The  
477 views expressed are those of the authors and not necessarily those of the NHS, the NIHR, the  
478 Department of Health or Public Health England. WM and KKC are supported by a

479 scholarship from the Medical Research Foundation National PhD Training Programme in  
480 Antimicrobial Resistance Research (MRF-145-0004-TPG-AVISO). NS is an Oxford Martin  
481 Fellow and a Senior NIHR BRC Oxford Fellow. LPS is a Sir Henry Wellcome Postdoctoral  
482 Fellow funded by Wellcome (grant 220422/Z/20/Z).  
483

484 **Bibliography**

- 485 1. Linh, T. D. *et al.* Expansion of KPC-producing Enterobacterales in four large hospitals  
486 in Hanoi, Vietnam. *Journal of Global Antimicrobial Resistance* **27**, (2021).
- 487 2. Kraftova, L. *et al.* Evidence of an epidemic spread of KPC-producing Enterobacterales  
488 in Czech hospitals. *Scientific Reports* **11**, (2021).
- 489 3. Cahill, N. *et al.* Hospital effluent: A reservoir for carbapenemase-producing  
490 Enterobacterales? *Science of the Total Environment* **672**, (2019).
- 491 4. Subramanya, S. H. *et al.* Detection and characterization of ESBL-producing  
492 Enterobacteriaceae from the gut of subsistence farmers, their livestock, and  
493 the surrounding environment in rural Nepal. *Scientific Reports* **11**, (2021).
- 494 5. Abuoun, M. *et al.* A genomic epidemiological study shows that prevalence of  
495 antimicrobial resistance in enterobacterales is associated with the livestock host, as  
496 well as antimicrobial usage. *Microbial Genomics* **7**, (2021).
- 497 6. Díaz-Gavidia, C. *et al.* Isolation of Ciprofloxacin and Ceftazidime-Resistant  
498 Enterobacterales From Vegetables and River Water Is Strongly Associated With the  
499 Season and the Sample Type. *Frontiers in Microbiology* **12**, (2021).
- 500 7. Buchy, P. *et al.* Impact of vaccines on antimicrobial resistance. *International Journal*  
501 *of Infectious Diseases* vol. 90 Preprint at <https://doi.org/10.1016/j.ijid.2019.10.005>  
502 (2020).
- 503 8. Ruppé, E. *et al.* From genotype to antibiotic susceptibility phenotype in the order  
504 Enterobacterales: a clinical perspective. *Clinical Microbiology and Infection* **26**,  
505 (2020).
- 506 9. Sheppard, A. E. *et al.* Nested Russian doll-like genetic mobility drives rapid  
507 dissemination of the carbapenem resistance gene *bla*kpc. *Antimicrobial Agents and*  
508 *Chemotherapy* **60**, (2016).



- 509 10. Che, Y. *et al.* Conjugative plasmids interact with insertion sequences to shape the  
510 horizontal transfer of antimicrobial resistance genes. *Proc Natl Acad Sci U S A* **118**,  
511 (2021).
- 512 11. Shaw, L. P. *et al.* Niche and local geography shape the pangenome of wastewater-and  
513 livestock-associated Enterobacteriaceae. *Science Advances* **7**, (2021).
- 514 12. Orlek, A. *et al.* Plasmid classification in an era of whole-genome sequencing:  
515 Application in studies of antibiotic resistance epidemiology. *Frontiers in Microbiology*  
516 vol. 8 Preprint at <https://doi.org/10.3389/fmicb.2017.00182> (2017).
- 517 13. Matlock, W. *et al.* Genomic network analysis of environmental and livestock F-type  
518 plasmid populations. *ISME Journal* **15**, (2021).
- 519 14. Redondo-Salvo, S. *et al.* Pathways for horizontal gene transfer in bacteria revealed by  
520 a global map of their plasmids. *Nature Communications* **11**, (2020).
- 521 15. Mounsey, O. *et al.* Limited phylogenetic overlap between fluoroquinolone-resistant  
522 *Escherichia coli* isolated on dairy farms and those causing bacteriuria in humans living  
523 in the same geographical region. *Journal of Antimicrobial Chemotherapy* **76**, (2021).
- 524 16. Hanage, W. P. Two health or not two health? That is the question. *MBio* **10**, e00550-19  
525 (2019).
- 526 17. Ludden, C. *et al.* One health genomic surveillance of *Escherichia coli* demonstrates  
527 distinct lineages and mobile genetic elements in isolates from humans versus livestock.  
528 *mBio* **10**, (2019).
- 529 18. Shen, C. *et al.* Dynamics of *mcr-1* prevalence and *mcr-1*-positive *Escherichia coli* after  
530 the cessation of colistin use as a feed additive for animals in China: a prospective  
531 cross-sectional and whole genome sequencing-based molecular epidemiological study.  
532 *The Lancet Microbe* **1**, e34–e43 (2020).

- 533 19. Hilpert, C., Bricheux, G. & Debroas, D. Reconstruction of plasmids by shotgun  
534 sequencing from environmental DNA: Which bioinformatic workflow? *Briefings in*  
535 *Bioinformatics* **22**, (2021).
- 536 20. Wang, R. *et al.* The global distribution and spread of the mobilized colistin resistance  
537 gene *mcr-1*. *Nat Commun* **9**, 1–9 (2018).
- 538 21. Sekizuka, T. *et al.* Complete sequencing of the bla NDM-1-positive IncA/C plasmid  
539 from Escherichia coli ST38 isolate suggests a possible origin from plant pathogens.  
540 *PLoS ONE* **6**, (2011).
- 541 22. Wick, R. R., Judd, L. M., Gorrie, C. L. & Holt, K. E. Unicycler: Resolving bacterial  
542 genome assemblies from short and long sequencing reads. *PLoS Computational*  
543 *Biology* **13**, (2017).
- 544 23. Lipworth, S. *et al.* Ten-year longitudinal molecular epidemiology study of Escherichia  
545 coli and Klebsiella species bloodstream infections in Oxfordshire, UK. *Genome*  
546 *Medicine* **13**, (2021).
- 547 24. Rozwandowicz, M. *et al.* Plasmids carrying antimicrobial resistance genes in  
548 Enterobacteriaceae. *Journal of Antimicrobial Chemotherapy* **73**, (2018).
- 549 25. Rodríguez-Beltrán, J., DelaFuente, J., León-Sampedro, R., MacLean, R. C. & San  
550 Millán, Á. Beyond horizontal gene transfer: the role of plasmids in bacterial evolution.  
551 *Nature Reviews Microbiology* vol. 19 Preprint at [https://doi.org/10.1038/s41579-020-](https://doi.org/10.1038/s41579-020-00497-1)  
552 [00497-1](https://doi.org/10.1038/s41579-020-00497-1) (2021).
- 553 26. Pesesky, M. W., Tilley, R. & Beck, D. A. C. Mosaic plasmids are abundant and  
554 unevenly distributed across prokaryotic taxa. *Plasmid* **102**, (2019).
- 555 27. David, S. *et al.* Integrated chromosomal and plasmid sequence analyses reveal diverse  
556 modes of carbapenemase gene spread among Klebsiella pneumoniae. *Proc Natl Acad*  
557 *Sci U S A* **117**, (2020).

- 558 28. Forster, S. C. *et al.* A human gut bacterial genome and culture collection for improved  
559 metagenomic analyses. *Nature Biotechnology* **37**, (2019).
- 560 29. Sender, R., Fuchs, S. & Milo, R. Revised Estimates for the Number of Human and  
561 Bacteria Cells in the Body. *PLoS Biology* **14**, (2016).
- 562 30. Rodrigues, C. *et al.* High Prevalence of *Klebsiella pneumoniae* in European Food  
563 Products: a Multicentric Study Comparing Culture and Molecular Detection Methods.  
564 *Microbiology Spectrum* **10**, (2022).

565

566

567 **Fig. 1. A diverse sample of geographically and temporally restricted *Enterobacteriales***  
 568 **(a)** Number of chromosomes and plasmids by niche, stratified by isolate genus. **(b)** Map of  
 569 approximate, relative distances between sampling sites, coloured by niche (human  
 570 bloodstream infection [BSI], livestock-associated (cattle, pig, poultry, and sheep faeces, soils  
 571 nearby livestock sites), and wastewater treatment work (WwTW)-associated sources  
 572 (influent, effluent, waterways upstream/downstream of effluent outlets). Number in circles  
 573 indicates how many of the  $n=1,458$  isolates are from that location. **(c)** Sampling timeframe  
 574 for BSI and REHAB (non-BSI) isolates.

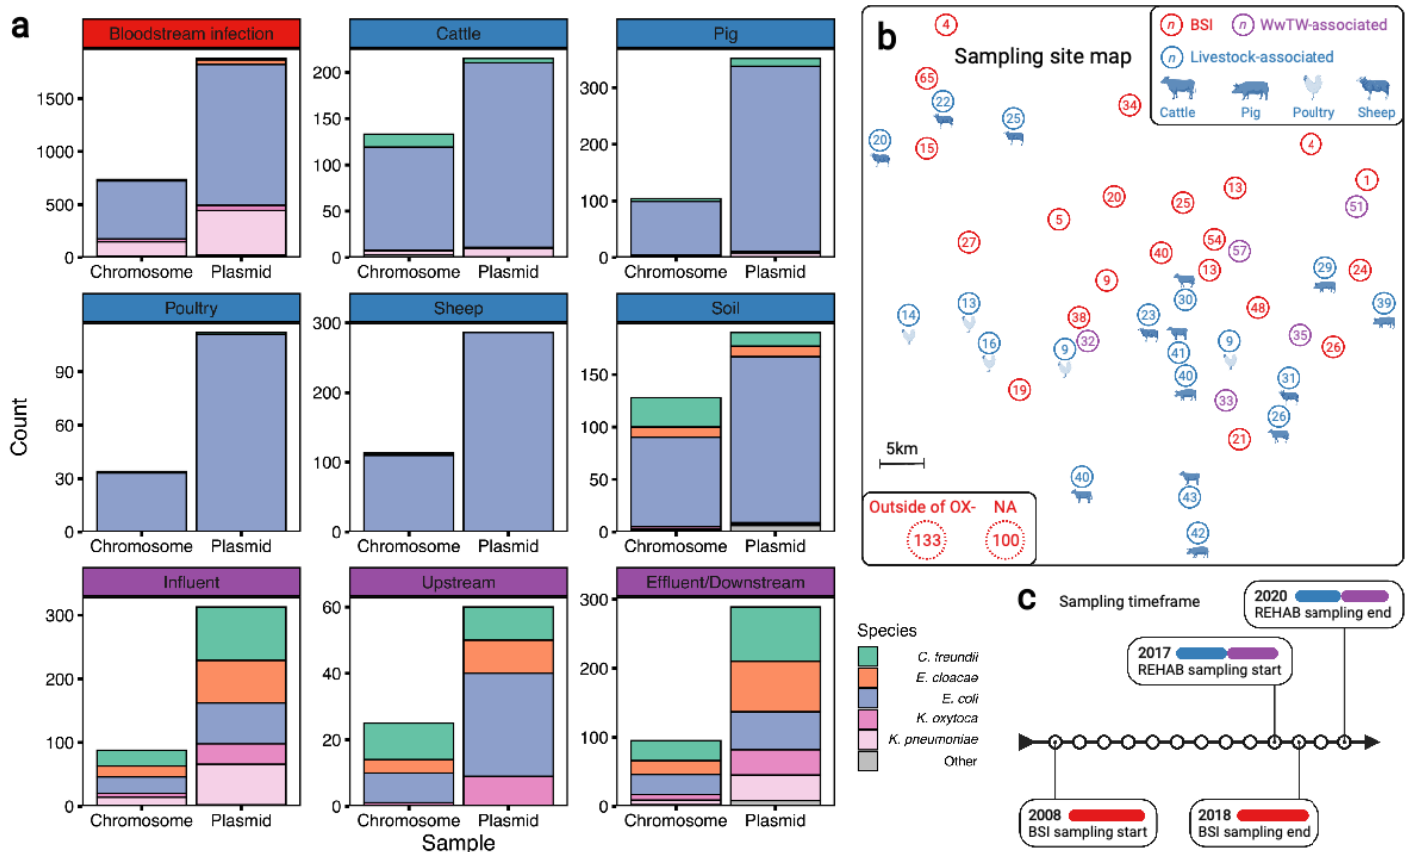

575 **Fig. 2 Cross-niche, near-identical plasmids.**

576 **(a)** Size of cross-niche, near-identical plasmid groups, coloured by niche (total  $n=84$

577 plasmids). Median length (bp) of plasmids within groups increases from left to right. **(b)**

578 Proportion of plasmid host species by group. **(c)** Predicted mobility of plasmid. **(d)** AMR

579 gene carriage in plasmid.

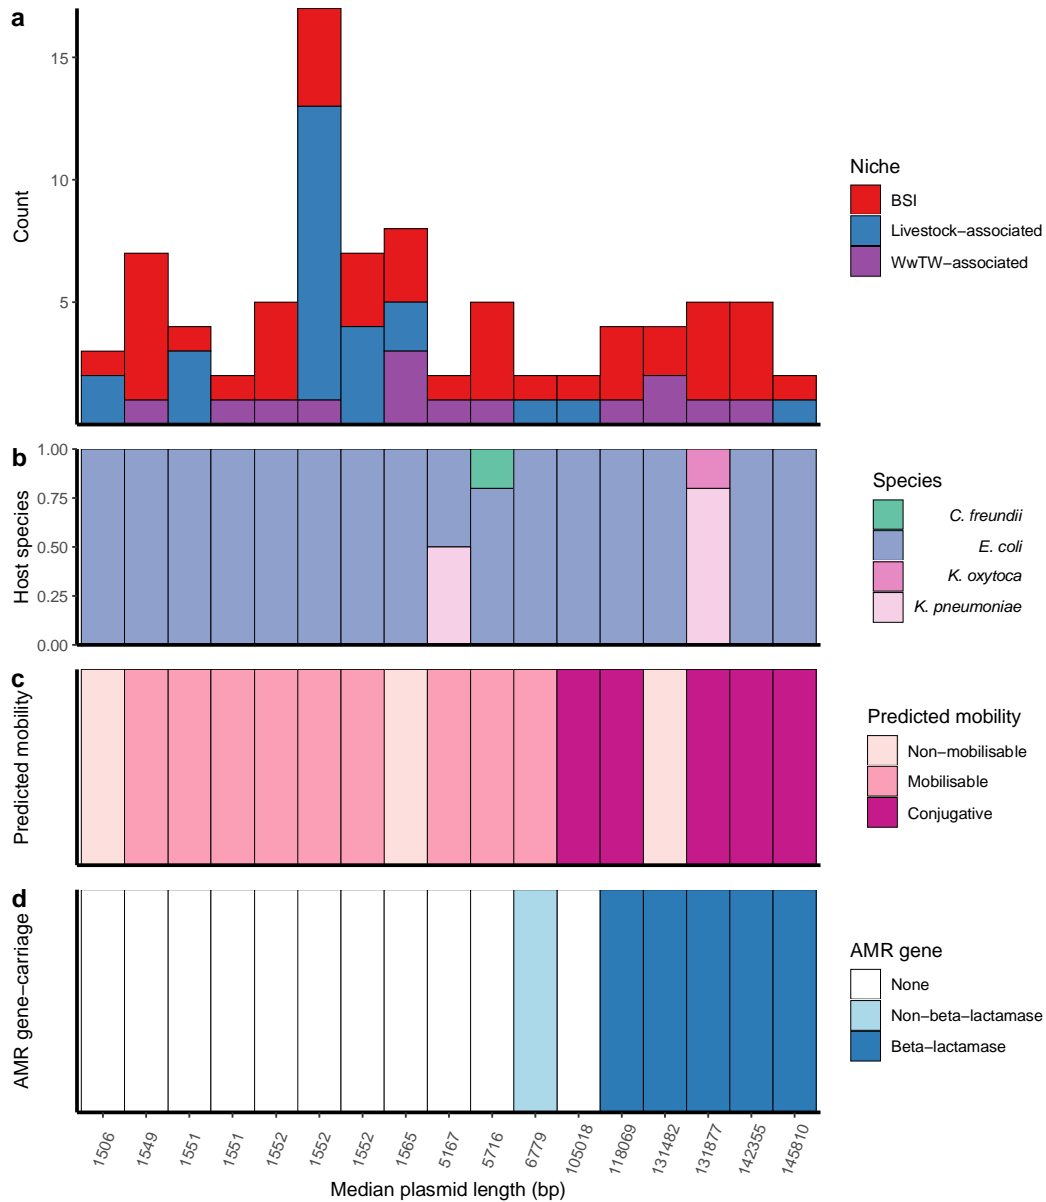

580 **Fig. 3. Genetically similar plasmids share between niches**

581 **(a)** Size of plasmid clusters with at least 10 members, coloured by niche. Size of clusters  
 582 decreases from left to right. **(b)** Proportion of plasmid host species by cluster. **(c)** Plasmid  
 583 mobility class and size: Left hand axis shows proportion of plasmids with a predicted  
 584 mobility class by cluster. Right hand axis shows plasmid length boxplots by cluster. **(d)**  
 585 Proportions of AMR gene carriage by cluster. **(e)** Plasmid core and accessory genomes: Left  
 586 hand axis shows the count of core and accessory coding sequences (CDS) by cluster. Right  
 587 hand axis shows plasmid core gene proportion (i.e., plasmid core CDS/total plasmid CDS)

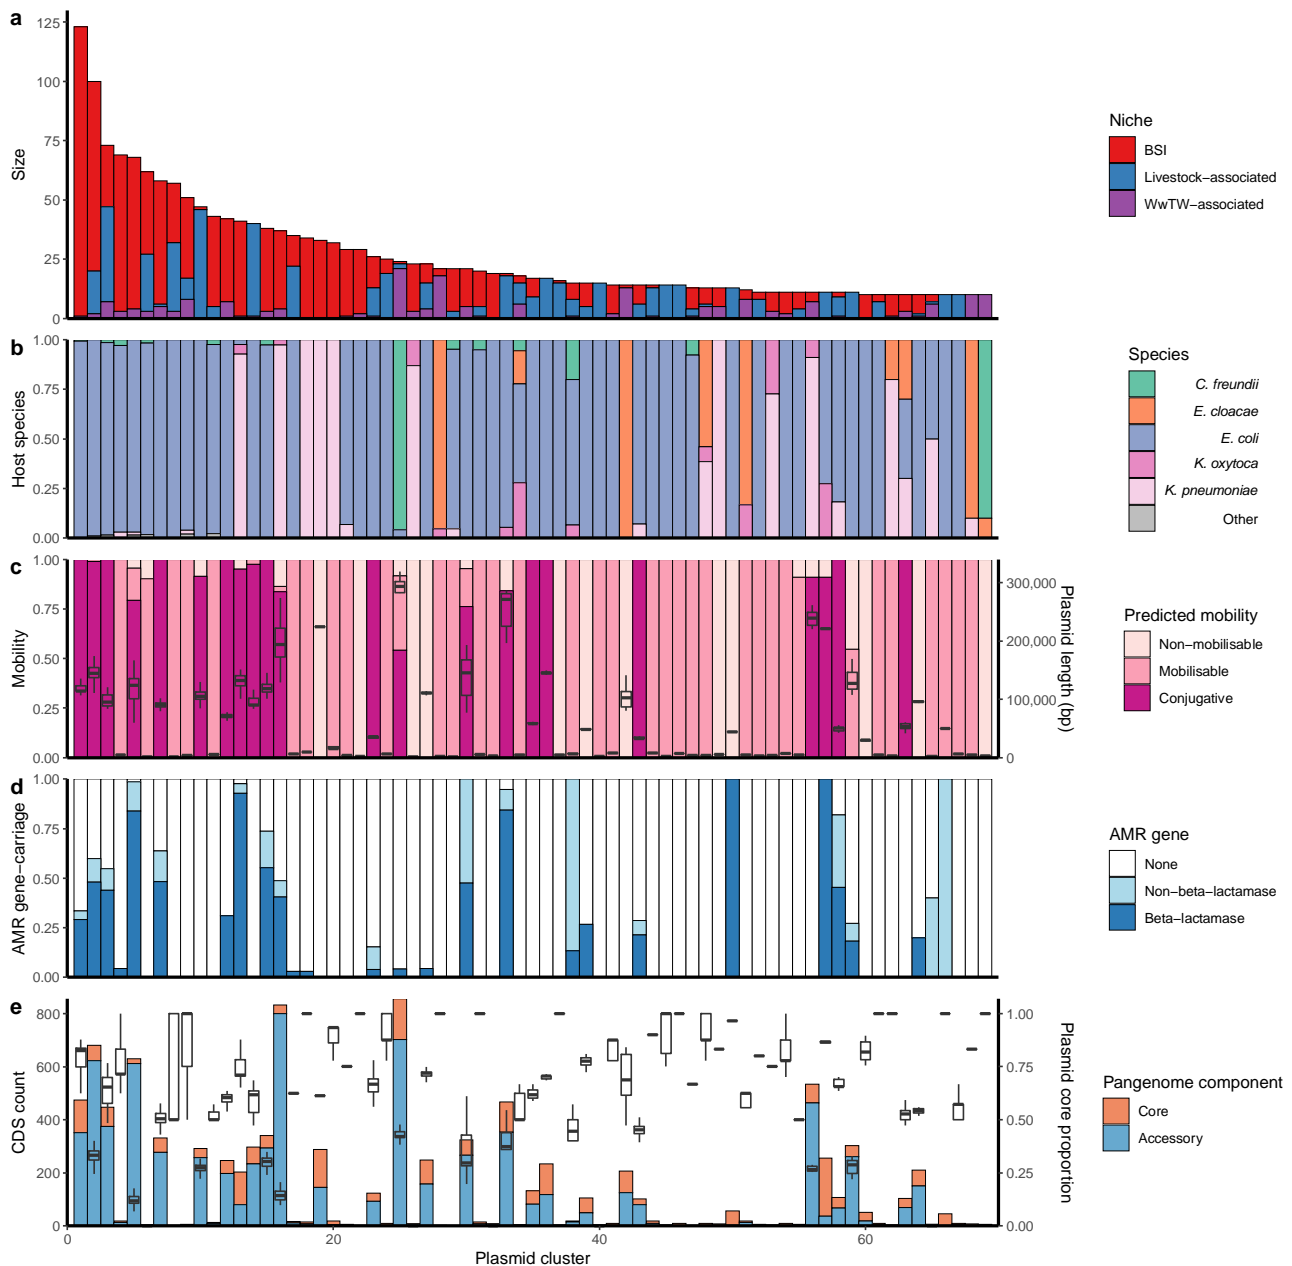

588 boxplots by cluster.

589 **Fig. 4. Cluster 2 plasmid and host evolution**

590 **(a)** Consensus gene ordering for plasmid cluster 2, coloured by gene type (total  $n=99$   
591 plasmids;  $n=1$  *S. enterica* isolate omitted). Genes are coloured by core, accessory, or  
592 transposase. **(b)** Plasmid core gene phylogeny with tips coloured by sampling niche. The grey  
593 circle highlights the clade of  $n=44$  plasmids which were further analysed. **(c)** Plasmid host  
594 chromosome core gene phylogeny with tips coloured by sampling niche. Plasmid and host  
595 phylogeny tips are connected in a ‘tanglegram’ which connects pairs of plasmids and  
596 chromosomes from the same isolate. **(d)** Visualisation of the pangraph for  $n=44$  plasmids in  
597 the grey-circled clade in (b). Blocks are coloured by presence in plasmids. **(e)** Core blocks  
598 (found in at least 95% of the  $n=44$  plasmids). **(f)** Accessory blocks (found in less than 95% of  
599 the  $n=44$  plasmids).

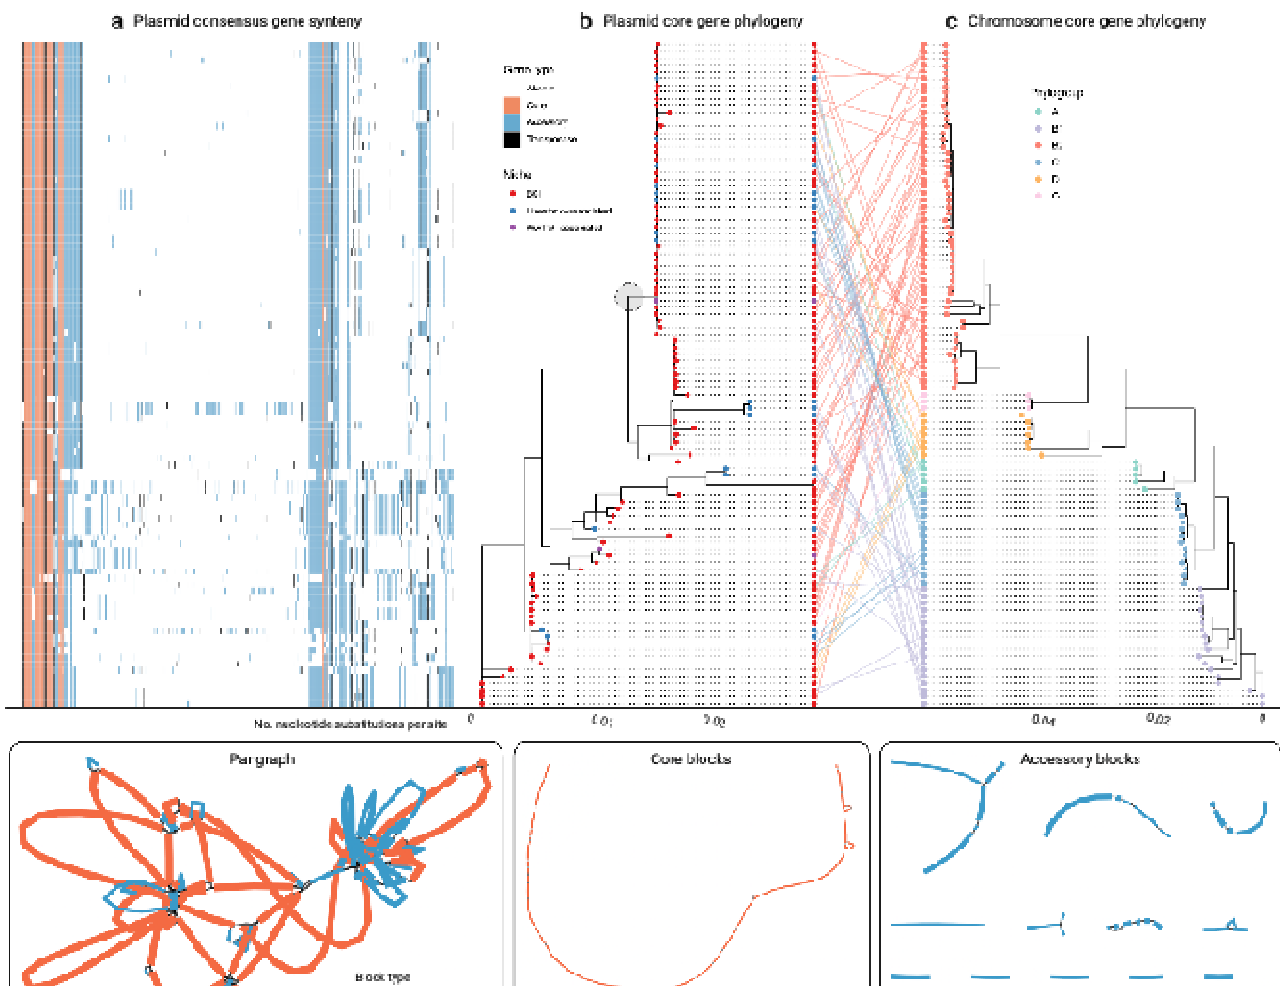



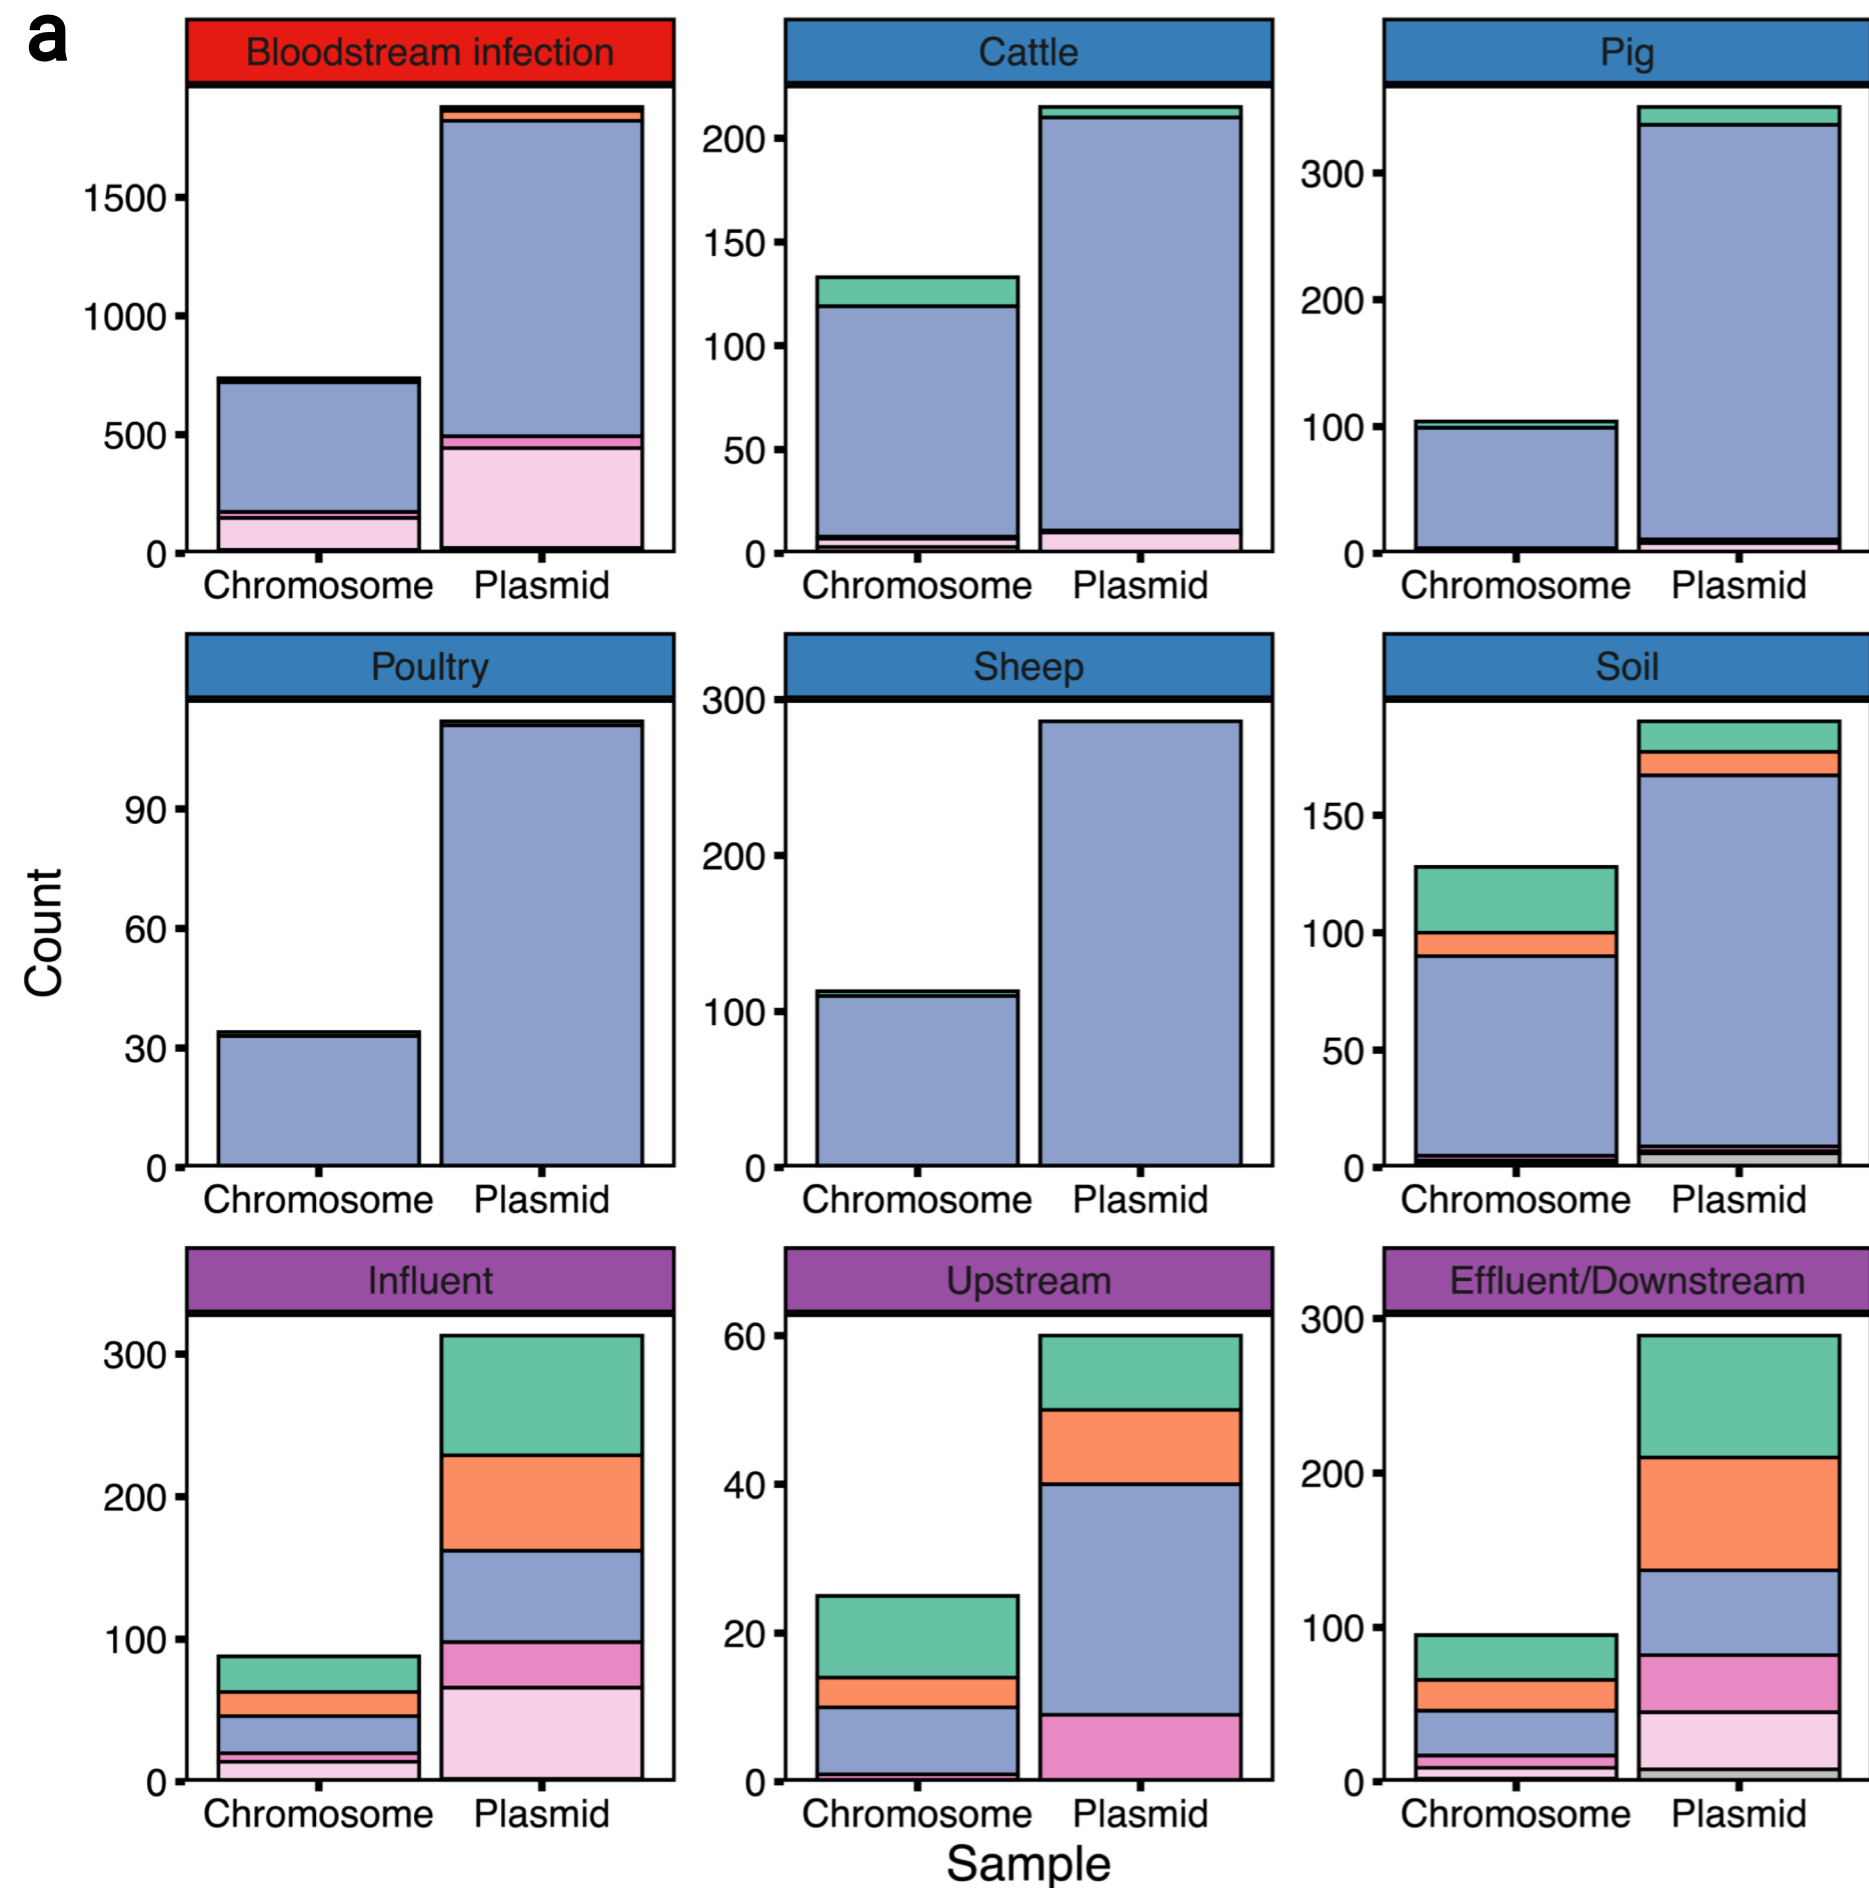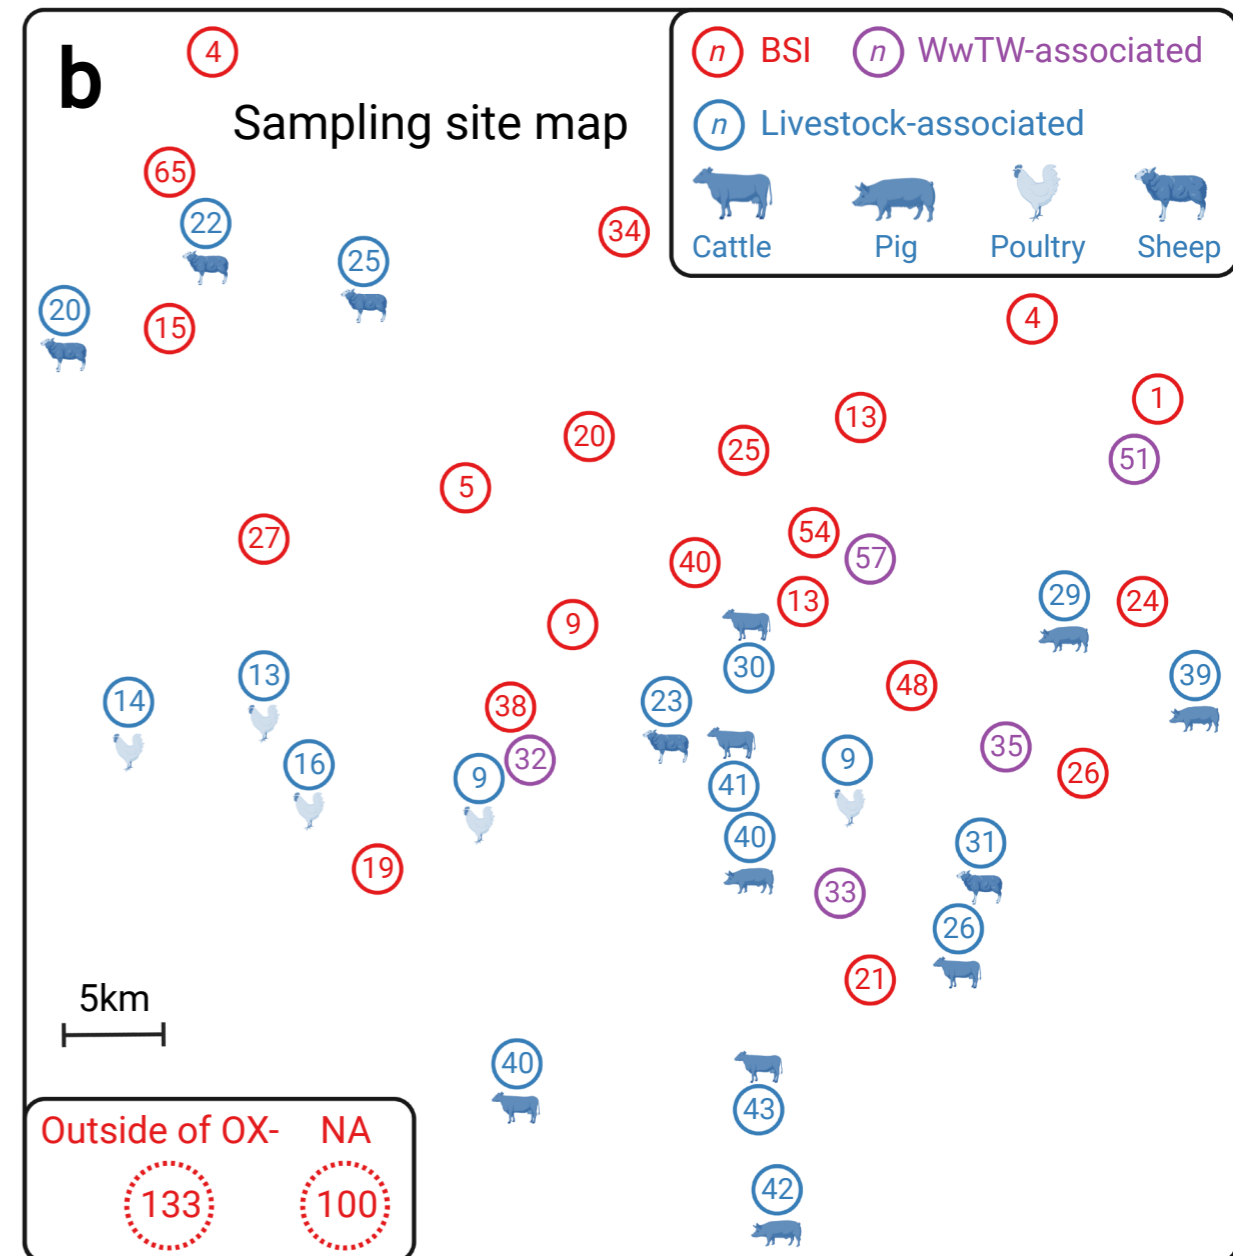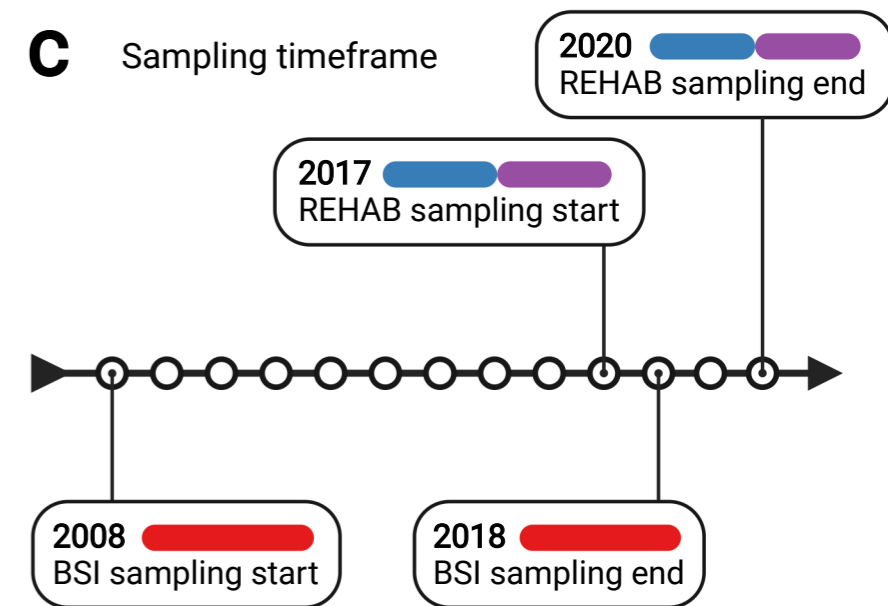

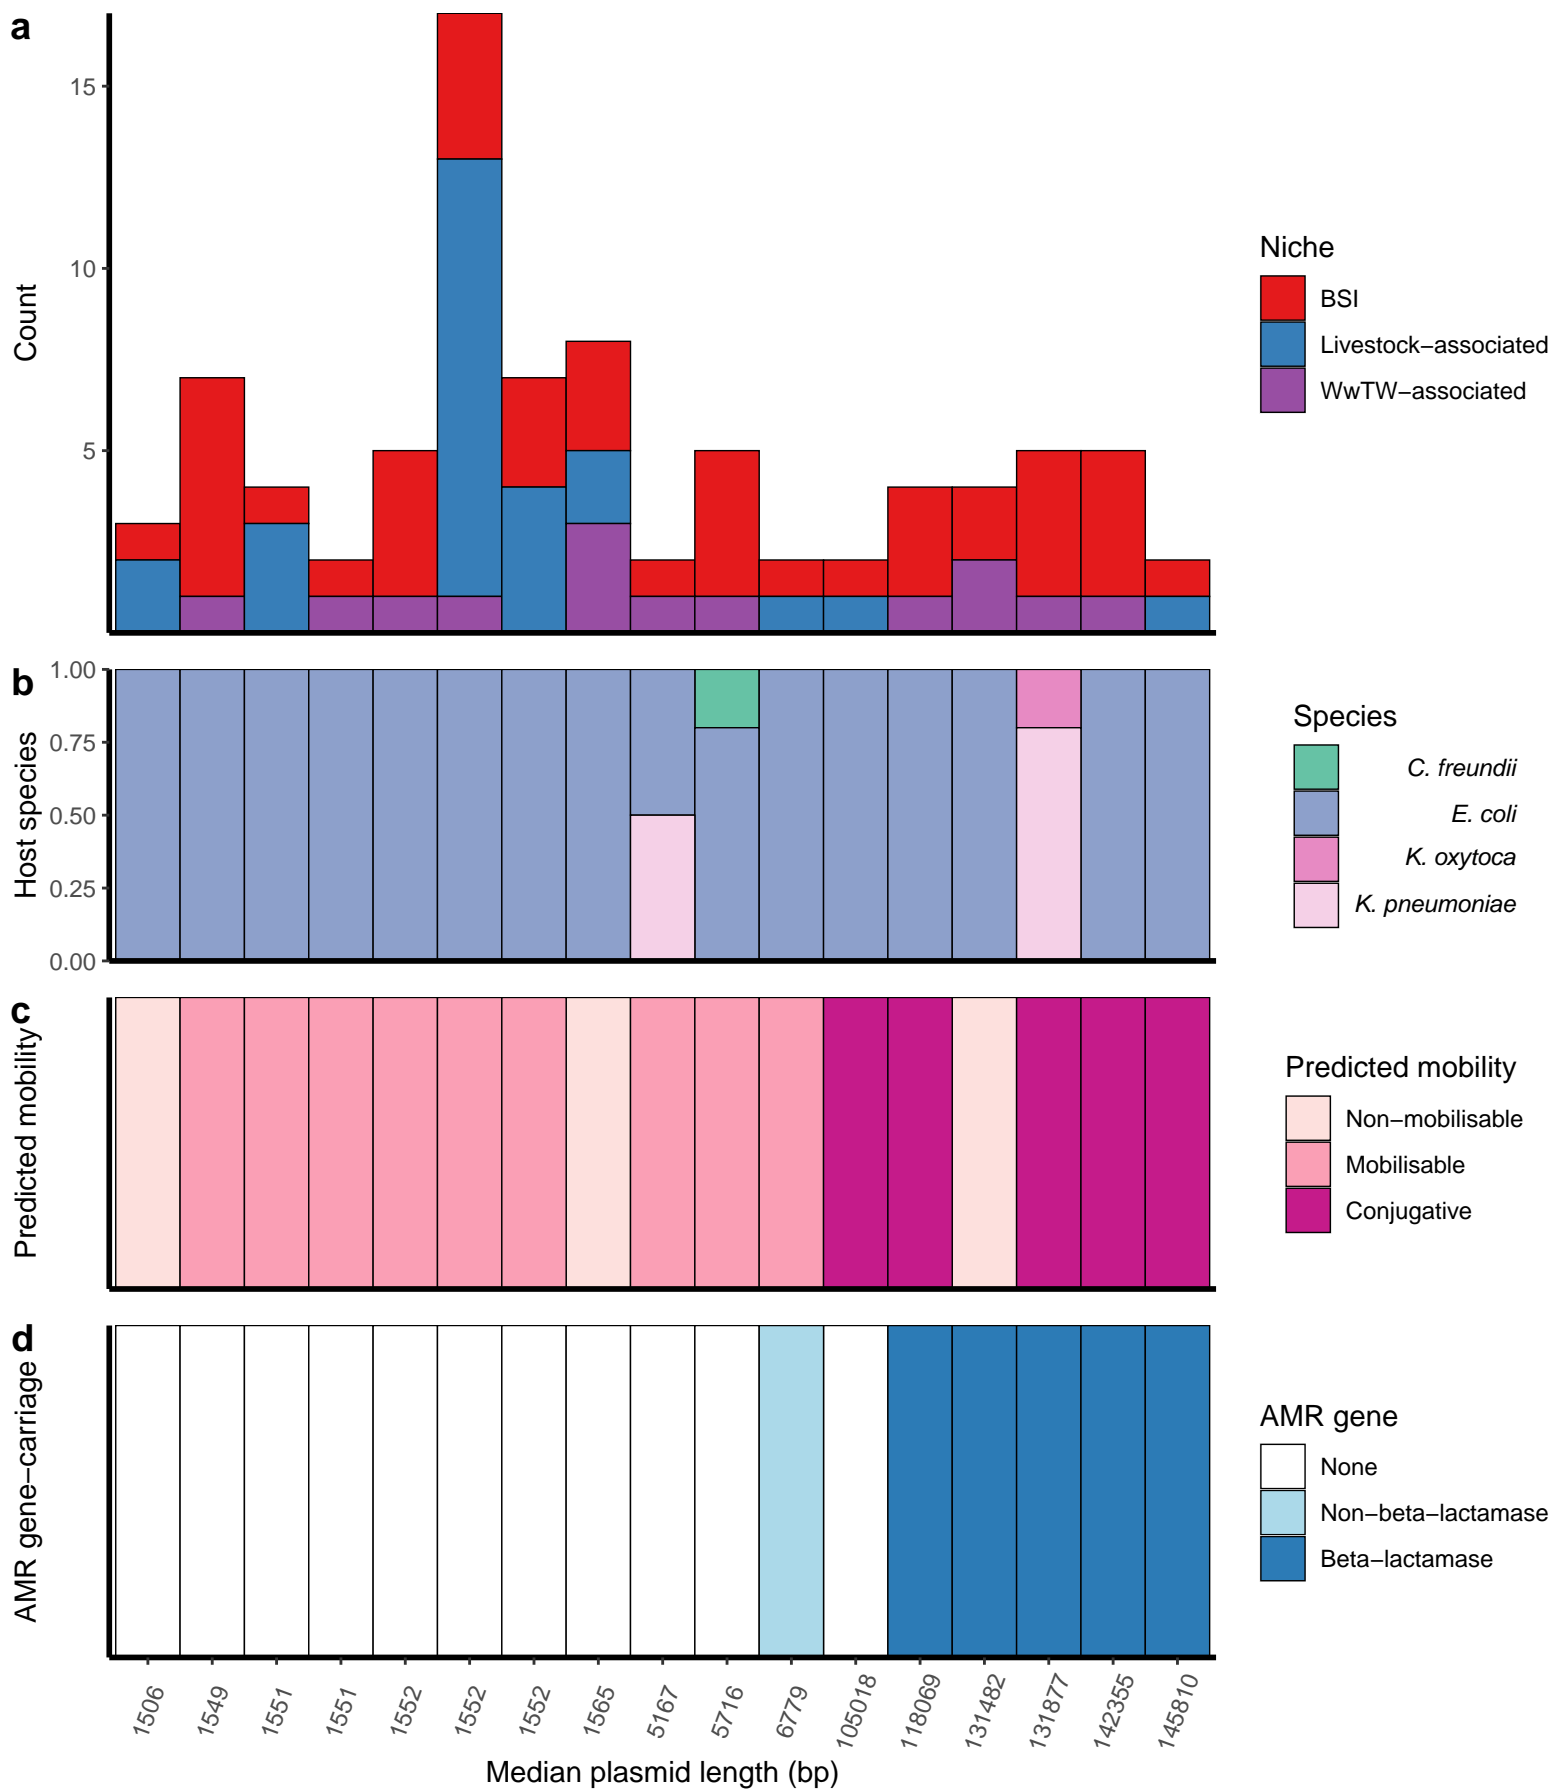

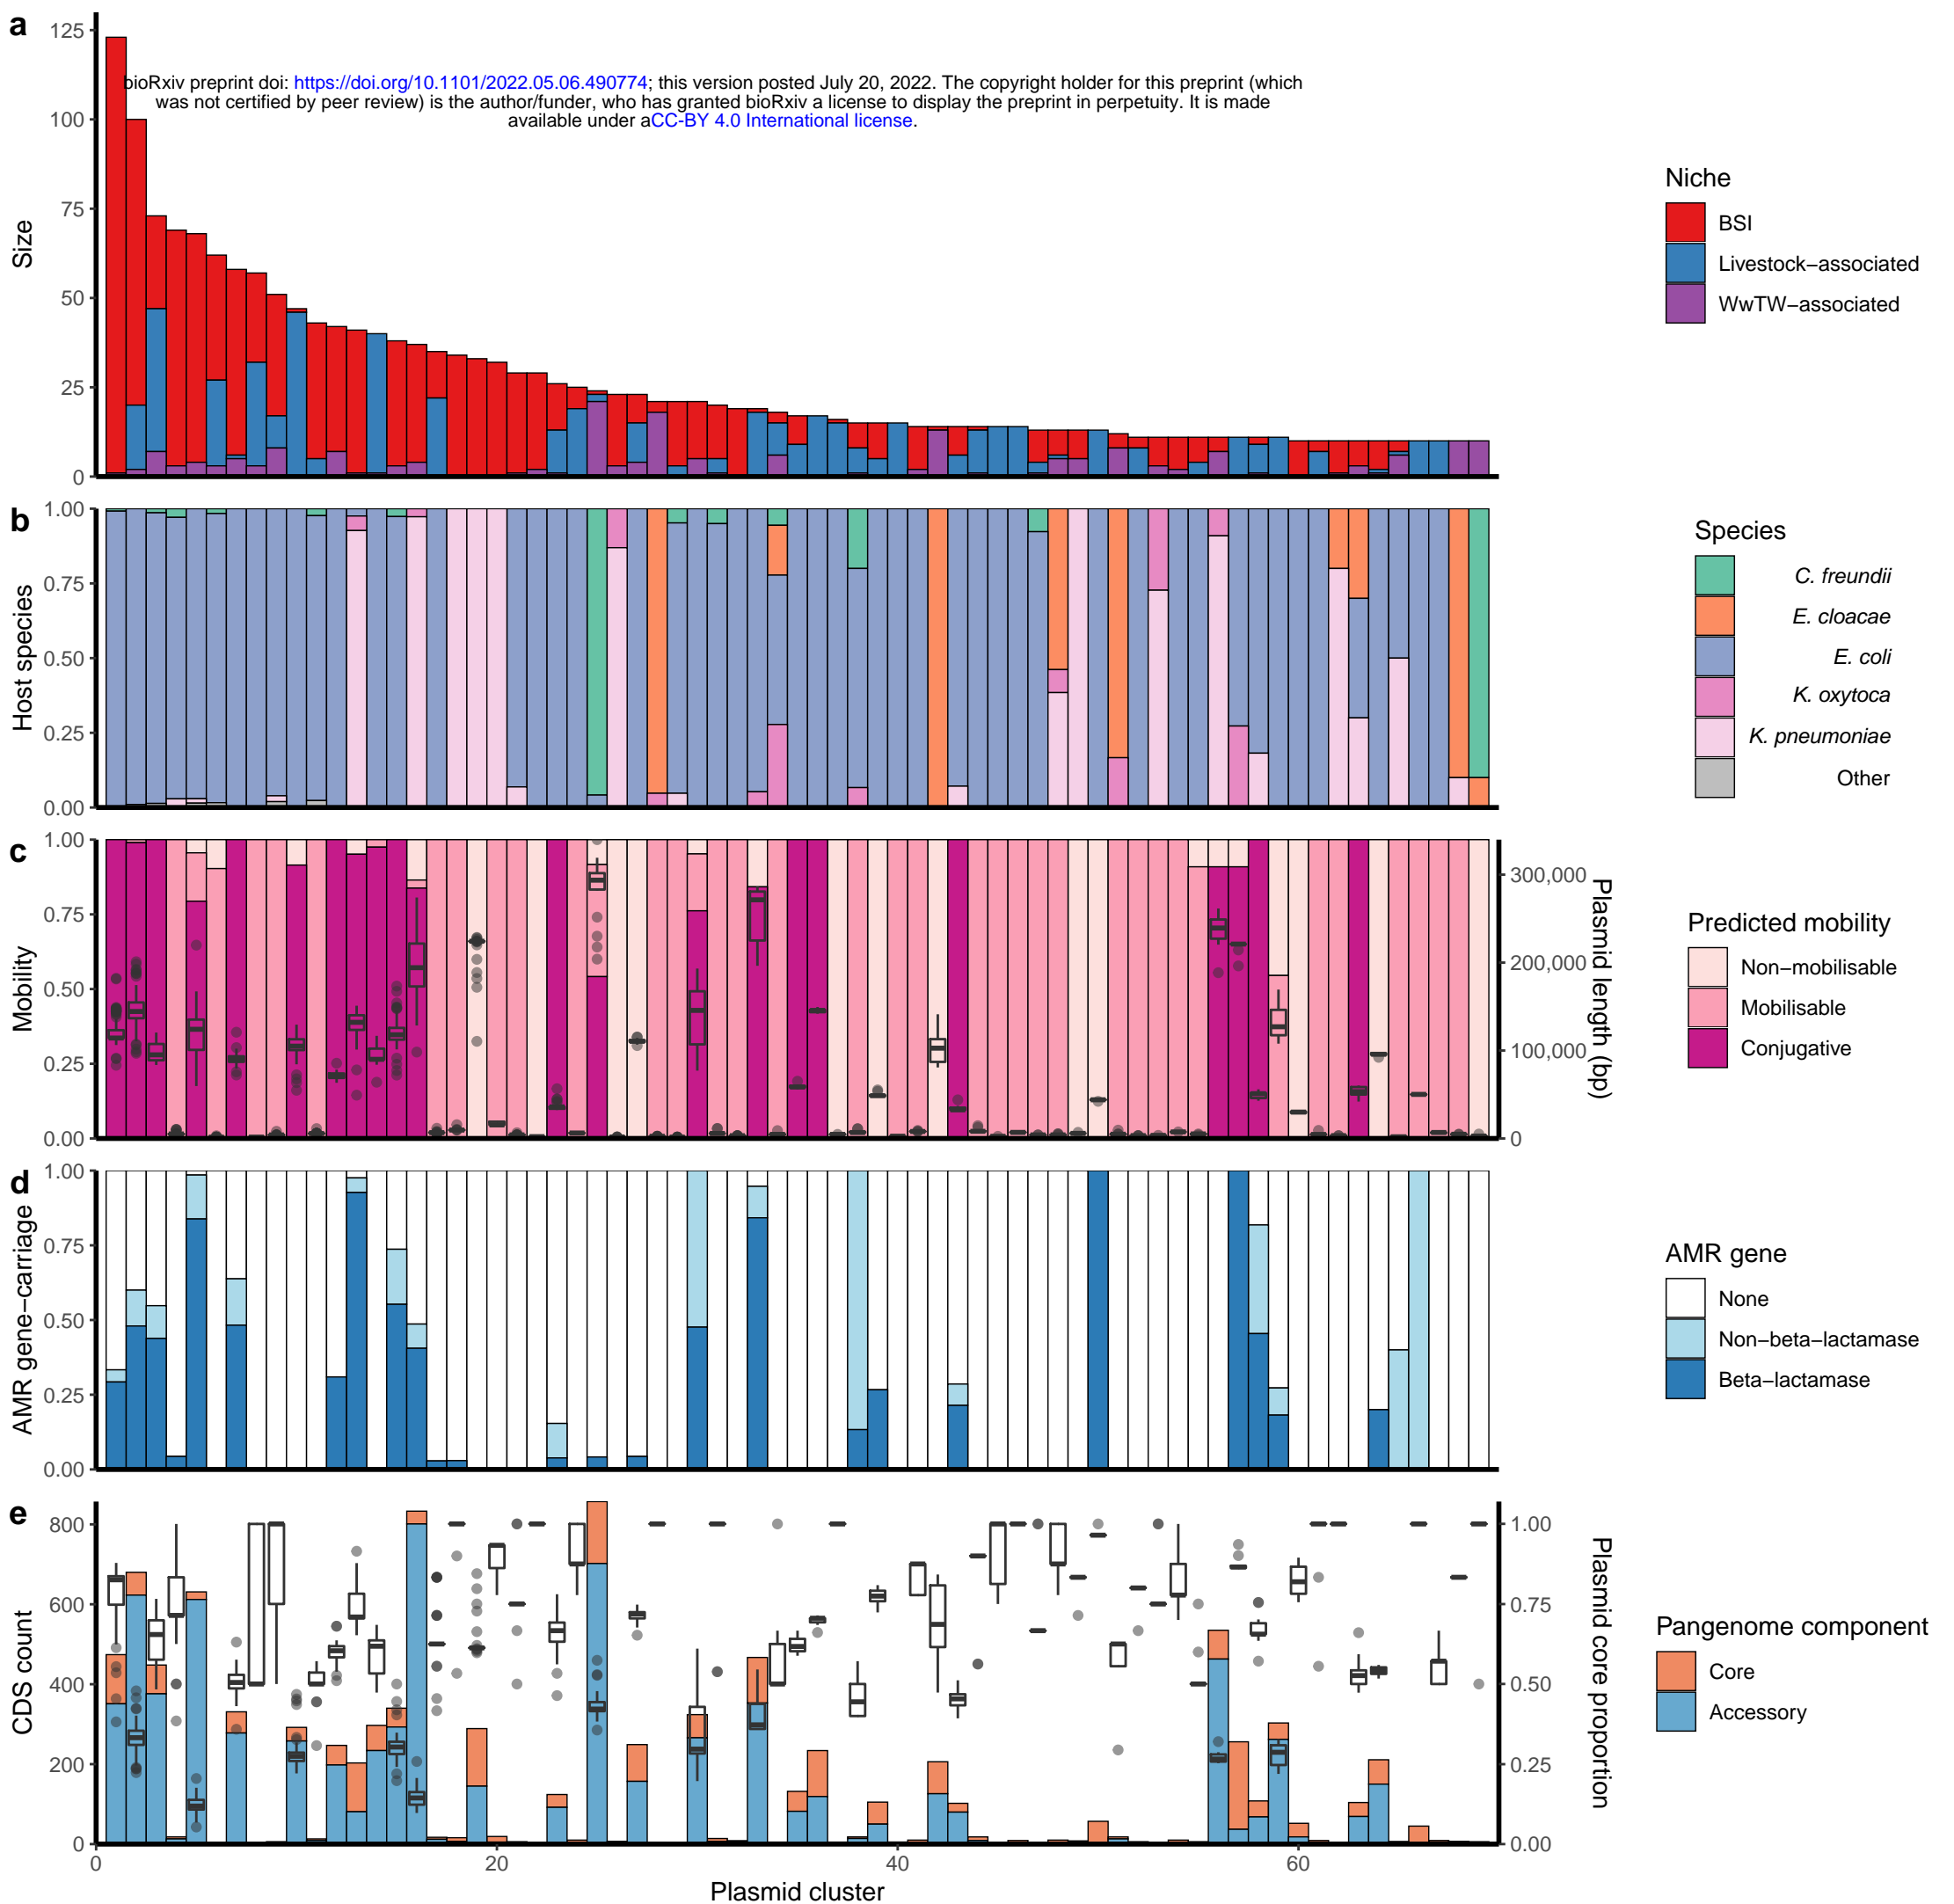

**a** Plasmid consensus gene synteny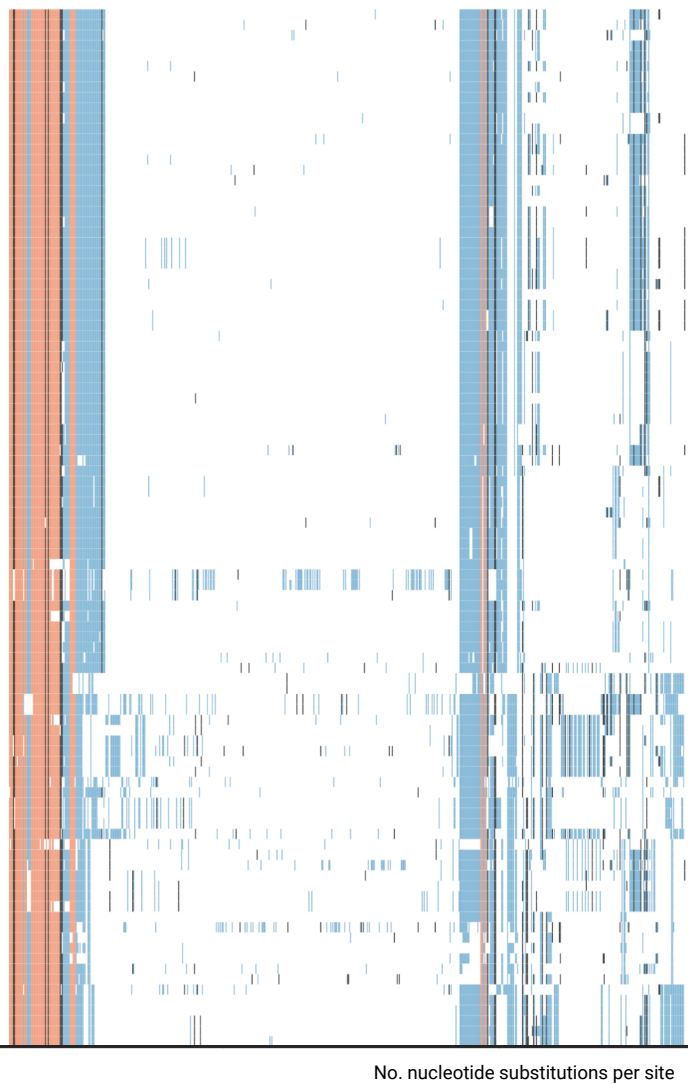**b** Plasmid core gene phylogeny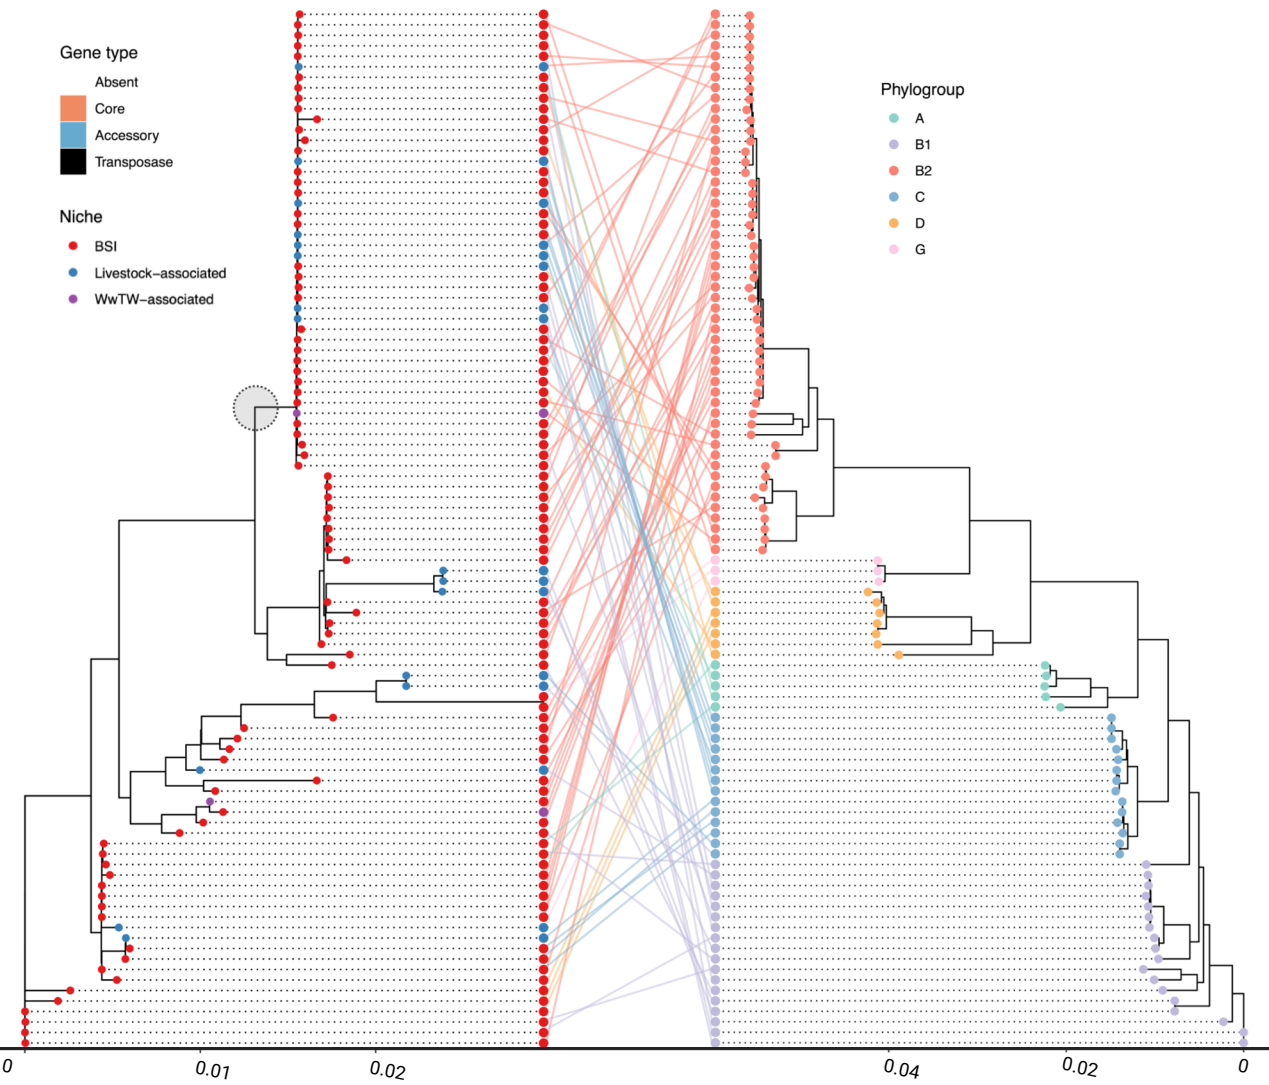**c** Chromosome core gene phylogeny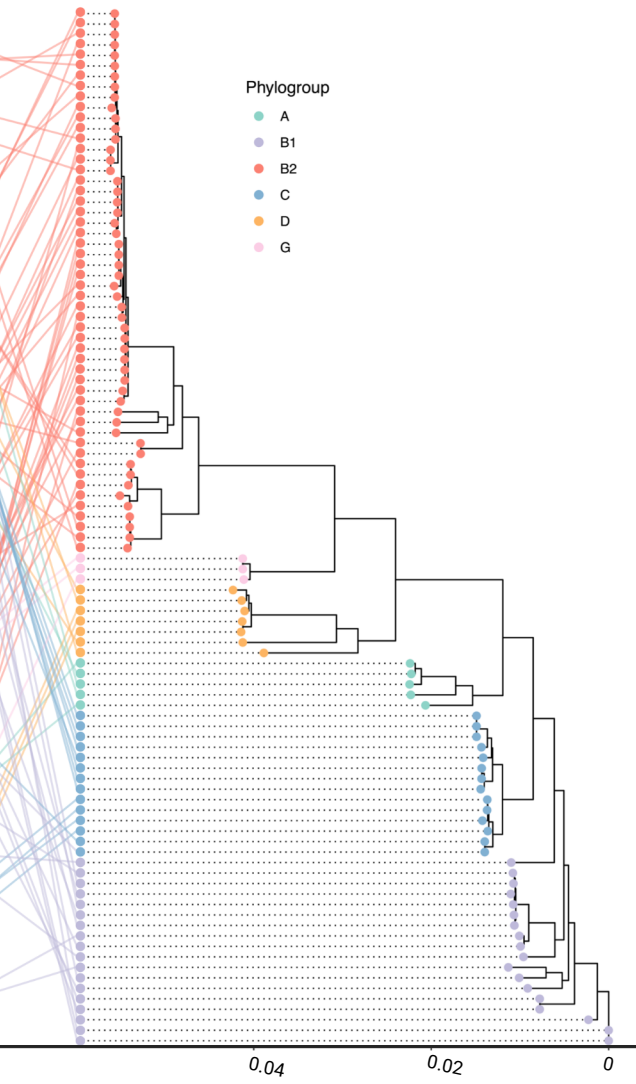**d** Pangraph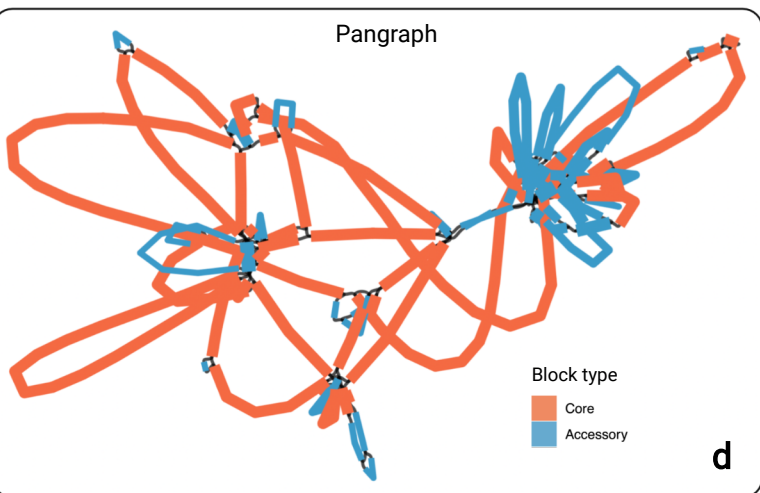**e** Core blocks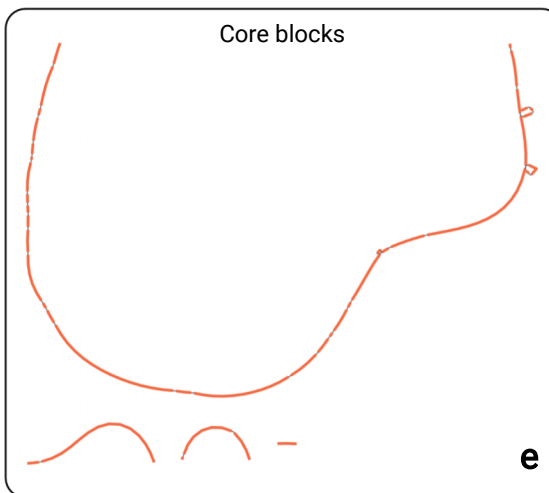**f** Accessory blocks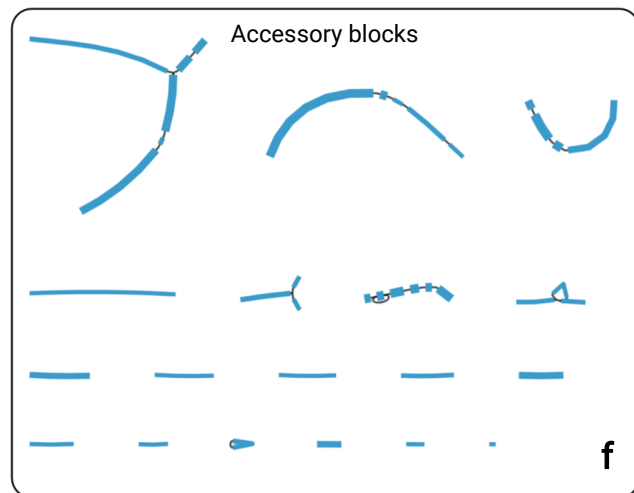

Source: https://www.biorxiv.org/content/10.1101/2022.05.06.490774v2.full.pdf
